1 Title: Constitutive AP2 $\gamma$  deficiency reduces postnatal hippocampal neurogenesis and  
2 induces behavioral deficits in juvenile mice that persist during adulthood

3

4 Running title: AP2 $\gamma$  on postnatal plasticity and behavior

5

6 **Eduardo Loureiro-Campos<sup>1,2\*</sup>, Nuno Dinis Alves<sup>1,2, $\alpha$ \*</sup>, António Mateus-Pinheiro<sup>1,2</sup>,**  
7 **Patrícia Patrício<sup>1,2</sup>, Carina Soares-Cunha<sup>1,2</sup>, Joana Silva<sup>1,2</sup>, Vanessa Morais Sardinha<sup>1,2</sup>,**  
8 **Bárbara Mendes-Pinheiro<sup>1,2</sup>, Tiago Silveira-Rosa<sup>1,2</sup>, Ana João Rodrigues<sup>1,2</sup>, João Filipe**  
9 **Oliveira<sup>1,2,3</sup>, Nuno Sousa<sup>1,2</sup> and Luísa Pinto<sup>1,2,#</sup>**

10

11 1. Life and Health Sciences Research Institute (ICVS, School of Medicine, University of Minho,  
12 Braga, Portugal

13

14 2. ICVS/3B's -PT Government Associate Laboratory, Braga/Guimarães, Portugal

15

16 3. IPCA-EST-2Ai, Polytechnic Institute of Cávado and Ave, Applied Artificial Intelligence  
17 Laboratory, Campus of IPCA, Barcelos, Portugal

18

19

20  <sup>$\alpha$</sup>  Current affiliation: Department of Psychiatry, Columbia University, New York, NY 10032,  
21 USA; New York State Psychiatric Institute, New York, NY 10032, USA

22 \* Eduardo Loureiro-Campos and Nuno Dinis Alves contributed equally to this work and are  
23 joint first authors.

24

25 # Correspondence to: [luisapinto@med.uminho.pt](mailto:luisapinto@med.uminho.pt);

26 Life and Health Sciences Research Institute (ICVS), School of Medicine, University of Minho,  
27 Campus de Gualtar, 4710-057 Braga, Portugal; tel: +351 253604929

28 **Abstract:**

29       The transcription factor activating protein two gamma (AP2 $\gamma$ ) is an important regulator of  
30 neurogenesis both during embryonic development as well as in the postnatal brain, but its role for  
31 neurophysiology and behavior at distinct postnatal periods is still unclear. In this work, we  
32 explored the neurogenic, behavioral, and functional impact of a constitutive AP2 $\gamma$  heterozygous  
33 deletion in mice from early postnatal development until adulthood. Constitutive AP2 $\gamma$   
34 heterozygous deletion in mice caused a reduction of hippocampal transient amplifying progenitors  
35 (TAPs) in the postnatal brain, inducing significant impairments on hippocampal-dependent  
36 emotional- and cognitive-behavioral tasks including anxiety-like behavior and cognitive deficits,  
37 typically associated with an intact neurogenic activity. Moreover, AP2 $\gamma$  deficiency impairs dorsal  
38 hippocampus-to-prefrontal cortex functional connectivity.

39       We observed a progressive and cumulative impact of constitutive AP2 $\gamma$  deficiency on the  
40 hippocampal glutamatergic neurogenic process, as well as alterations on limbic-cortical  
41 connectivity, together with impairments on emotional and cognitive behaviors from juvenile to  
42 adult periods. Collectively, the results herein presented demonstrate the importance of AP2 $\gamma$  in  
43 the generation of glutamatergic neurons in the postnatal brain and its impact on behavioral  
44 performance.

45

46 **Keywords:** Hippocampal neurogenesis, AP2 $\gamma$ , anxiety, cognition, spectral coherence.

## 47 **Introduction:**

48           New cells are continuously generated, differentiated into neurons, and integrated into the  
49 preexisting neural networks in restricted regions of the postnatal mice brain (Boldrini et al., 2018;  
50 Dennis et al., 2016; Kempermann et al., 2018; Moreno-Jiménez et al., 2019; Tobin et al., 2019).  
51 One of these so-called neurogenic niches is the subgranular zone (SGZ) of the hippocampal  
52 dentate gyrus (DG). Here, neural stem cells (NSC) give rise to mature neural cells including  
53 glutamatergic granular neurons in a finely tuned process with many developmental steps  
54 sensitive to different regulatory influences (Kempermann et al., 2004; Mateus-Pinheiro et al.,  
55 2017; Tobin et al., 2019; Toda et al., 2019). Postnatal hippocampal glutamatergic neurogenesis  
56 exhibits a regulatory transcriptional sequence (Sox2→ Pax6→ Ngn2→ AP2 $\gamma$ → Tbr2→ NeuroD→  
57 Tbr1) that recapitulates the hallmarks of the embryonic glutamatergic neurogenic process in the  
58 cerebral cortex (Hochgerner et al., 2018; Mateus-Pinheiro et al., 2017; Nacher et al., 2005).  
59 Transcriptional factors as Pax6, Ngn2, Tbr2, NeuroD, and Tbr1 have several and distinct roles in  
60 proliferation, cell kinetics, fate specification, and axonal growth (Englund, 2005; Götz et al., 1998;  
61 Hevner, 2019; Hevner et al., 2006; Hochgerner et al., 2018).

62           Despite several efforts to understand the complex transcriptional network orchestration  
63 involved in the regulation of neurogenesis, both in early developmental stages and during  
64 adulthood, these are still to be fully understood (Bertrand et al., 2002; Brill et al., 2009; Englund,  
65 2005; Hack et al., 2005; Hsieh, 2012; Mateus-Pinheiro et al., 2017; Waclaw et al., 2006).  
66 Recently, the transcription factor activating protein 2 gamma (AP2 $\gamma$ , also known as Tcfap2c or  
67 Tfa2c) was described to be an important regulator of glutamatergic neurogenesis in the adult  
68 hippocampus, being involved in the regulation of transient amplifying progenitors (TAPs) cells  
69 (Hochgerner et al., 2018; Mateus-Pinheiro et al., 2018, 2017). AP2 $\gamma$  belongs to the AP2 family of  
70 transcription factors that is highly involved in several systems and biological processes, such as  
71 cell proliferation, adhesion, developmental morphogenesis, tumor progression and cell fate  
72 determination (Eckert et al., 2005; Hilger-Eversheim et al., 2000; Thewes et al., 2010). In addition,  
73 AP2 $\gamma$  is functionally relevant during embryonic neocortical development, playing detrimental roles  
74 in early mammalian extraembryonic development and organogenesis (Pinto et al., 2009). AP2 $\gamma$  is  
75 critical for the specification of glutamatergic neocortical neurons and their progenitors, acting as  
76 a downstream target of Pax6 and being involved in the regulation of Tbr2 and NeuroD basal  
77 progenitors' determinants (Mateus-Pinheiro et al., 2017; Pinto et al., 2009). Strikingly, in humans,  
78 defects in the AP2 $\gamma$  gene were reported in patients with severe pre- and post-natal growth  
79 retardation (Geneviève et al., 2005), and to be involved in the mammary, ovarian and testicular  
80 carcinogenesis (Hoei-Hansen et al., 2004; Li et al., 2002; Ødegaard et al., 2006).

81           AP2 $\gamma$  deletion during embryonic development results in a specific reduction of upper layer  
82 neurons in the occipital cerebral cortex, while its overexpression increases region- and time-

83 specific generation of neurons from cortical layers II/III (Pinto et al., 2009). AP2 $\gamma$  expression  
84 persists in the adult hippocampus, particularly in a sub-population of TAPs acting as a positive  
85 regulator of the cell fate modulators, Tbr2 and NeuroD, and therefore as a promoter of proliferation  
86 and neuronal differentiation (Mateus-Pinheiro et al., 2017). Conditional and specific  
87 downregulation of AP2 $\gamma$  in the adult brain NSCs decreases the generation of new neurons in the  
88 hippocampal DG and disrupts the electrophysiological synchronization between the hippocampus  
89 and the medial prefrontal cortex (mPFC). Furthermore, mice with AP2 $\gamma$  conditional deletion  
90 exhibited behavioral impairments, particularly a deficient performance in cognitive-related tasks  
91 (Mateus-Pinheiro et al., 2018, 2017).

92         These studies reveal the crucial modulatory role of AP2 $\gamma$  during embryonic cerebral cortex  
93 development as well as its influence on glutamatergic neurogenesis and hippocampal-dependent  
94 behaviors during adulthood. Still, it is important to identify the longitudinal postnatal relevance of  
95 AP2 $\gamma$  to brain neurophysiology and behavior. Thus, in the present study, we explored the  
96 neurogenic, behavioral and functional impact of constitutive AP2 $\gamma$  heterozygous deletion in mice  
97 since early postnatal development until adulthood. We revealed a progressive impact of AP2 $\gamma$   
98 deficiency on the hippocampal glutamatergic neurogenic process, alterations on limbic-cortical  
99 connectivity, accompanied by behavioral impairments on emotional and cognitive modalities from  
100 juvenile period to adulthood.

101

## 102 **Results:**

### 103 **Constitutive AP2 $\gamma$ deficiency decreases proliferation and neurogenesis in the postnatal** 104 **DG, without affecting neuronal morphology**

105 We sought to dissect the impact of constitutive and heterozygous deficiency of AP2 $\gamma$  in  
106 the modulation of postnatal neuronal plasticity in the hippocampus, including its effect in the  
107 hippocampal neurogenic niche and in the morphology of pre-existing DG granule neurons at  
108 different postnatal periods. In juvenile and adult mice, we assessed the expression of markers for  
109 different cell populations along the neurogenic process through western blot and  
110 immunofluorescence, and the morphology of granule neurons in the DG using the Golgi-Cox  
111 staining method (Figure 1A and B). We observed a significant decrease in the expression levels  
112 of AP2 $\gamma$  protein in the hippocampal DG of juvenile (Figure 1C) and adult (Figure 1D) AP2 $\gamma^{+/-}$  mice,  
113 with concomitant reduction of Pax6 and Tbr2 protein levels, but not Sox2, an upstream regulator  
114 of AP2 $\gamma$  (Mateus-Pinheiro et al., 2017).

115 Analysis of cell populations in the hippocampal neurogenic niche using BrdU and  
116 doublecortin (DCX) labelling (Figure 1E) revealed that the number of BrdU $^{+}$  and BrdU $^{+}$ DCX $^{+}$  cells  
117 is reduced in both juvenile and adult AP2 $\gamma^{+/-}$  mice, suggesting a decrease in the number of fast  
118 proliferating cells (transient amplifying progenitor cells (TAPs) and neuroblasts, respectively  
119 (Figure 1F-I). Of note, we observed a decrease in these cell populations with age in both WT and  
120 AP2 $\gamma^{+/-}$  mice in agreement with previous reports (Kase et al., 2020; Katsimpardi and Lledo, 2018)  
121 (BrdU $^{+}$ : Supplementary Figure 1A; BrdU $^{+}$ DCX $^{+}$ : Supplementary Figure 1B). In contrast, and  
122 despite an increased length (Supplementary Figure 1C) and neuronal arborization  
123 (Supplementary Figure 1D) of DG granular neurons with age, constitutive deficiency of AP2 $\gamma$  does  
124 not impact neither the dendritic length (Figure 1J-K), nor the neuronal complexity, in both  
125 postnatal periods (Supplementary Figure 1D).

126 These results highlight that AP2 $\gamma$  modulatory actions in the hippocampal neurogenic niche  
127 are similar and maintained in juvenile and adult mice. AP2 $\gamma$  transcription factor regulates NSCs  
128 proliferation and neuronal differentiation in the postnatal hippocampus by interacting with the  
129 different modulators involved in the transcriptional regulation of postnatal hippocampal  
130 neurogenesis.

131

### 132 **AP2 $\gamma^{+/-}$ mice display normal early postnatal development but anxiety-like behavior and** 133 **cognitive impairments at juvenile period**

134 In light of the negative impact of AP2 $\gamma$  heterozygous deficiency in the postnatal neurogenic  
135 process in the hippocampus, known as an important modulator of emotional and cognitive  
136 functions (Christian et al., 2014; Toda et al., 2019), we assessed early postnatal development  
137 and the behavioral performance of WT and AP2 $\gamma^{+/-}$  at juvenile and adult periods.

138 Evaluation of early postnatal development was performed through the assessment of  
139 somatic and neurobiological parameters during the first 21 postnatal days (Supplementary Figure  
140 2). Despite a variation in the eye-opening day, responsiveness in sensory-motor functions,  
141 vestibular area-dependent tasks, and strength, as well somatic parameters were similar in WT  
142 and AP2 $\gamma^{+/-}$  mice. Furthermore, all analyzed parameters were within the previously described  
143 range (Guerra-Gomes et al., 2020; Heyser, 2003). These observations suggest that constitutive  
144 heterozygous deletion of AP2 $\gamma$  has no impact on early postnatal development.

145 In juvenile mice (between PND 25-31), we performed the open-field (OF) test to assess  
146 locomotor and anxiety-like behavior, tail suspension test (TST) and sucrose splash test (SST) to  
147 assess behavioral despair and anhedonic-like behavior, and the object recognition test (ORT) to  
148 assess memory (Figure 2A). In the OF, juvenile AP2 $\gamma^{+/-}$  mice exhibited a lower distance traveled  
149 in the anxiogenic center of the arena in comparison to WT animals (Figure 2B) suggesting an  
150 anxiety-like phenotype. Of note, WT and AP2 $\gamma^{+/-}$  mice display similar average velocities when  
151 performing the test, indicating no changes in locomotor activity (Supplementary Figure 3A).  
152 Assessment of behavioral despair and anhedonic-like behavior revealed no impact of constitutive  
153 AP2 $\gamma$  heterozygous deletion in these emotional domains, as no alterations were observed in the  
154 immobility time in the TST (Figure 2C) and grooming time in the SST (Figure 2D). Notably, despite  
155 no differences in the novel object location (Figure 2E and F), AP2 $\gamma^{+/-}$  mice displayed significant  
156 deficits in the novel object recognition, as denoted by a decreased preference to explore the novel  
157 object (Figure 2G).

158 These observations suggest that despite no evident impact on early postnatal  
159 development, constitutive AP2 $\gamma$  heterozygous deficiency leads to memory impairments and an  
160 anxious-like phenotype at juvenile period.

161  
162 **AP2 $\gamma^{+/-}$  adult mice exhibit significant impairments in emotional and cognitive behavioral**  
163 **modalities**

164 At adulthood, behavioral assessment included OF test and elevated plus-maze (EPM) to  
165 evaluate anxiety-like behavior, forced swimming test (FST) and TST to examine behavioral  
166 despair, and ORT, contextual fear conditioning (CFC) and Morris water maze (MWM) to evaluate  
167 cognitive performance (Figure 3A). In the OF test, AP2 $\gamma^{+/-}$  mice showed a trend towards a  
168 decrease in the distance traveled in the anxiogenic center of the arena ( $p = 0.05$ , Figure 3B), with  
169 no changes in locomotor activity as denoted by similar average velocity assessment  
170 (Supplementary Figure 4A). Moreover, in the EPM test, AP2 $\gamma^{+/-}$  mice spent significantly less time  
171 in the open-arms than WT mice (Figure 3C). AP2 $\gamma^{+/-}$  mice do not show any changes in behavioral  
172 despair since immobility times in FST (Figure 3D) and TST (Figure 3E) are identical to WT mice.

173 These observations suggest that anxiety-like behavior promoted by constitutive AP2 $\gamma$  deficiency  
174 tend to persist in adult mice, with no alteration in behavioral despair.

175 Cognitive performance assessed by ORT revealed a trend towards a decrease in the  
176 preference to explore the displaced object of AP2 $\gamma^{+/-}$  when compared to WT mice ( $p = 0.08$ , Figure  
177 3F). However, no alterations were observed in preference towards the novel object (Figure 3G).  
178 In the CFC, a behavior test described to be sensitive to changes in adult hippocampal  
179 neurogenesis (Gu et al., 2012), mice were subjected to two distinct context tests, aimed to test  
180 hippocampal-dependent memory, and a cue probe to assess the integrity of extrahippocampal  
181 memory circuits (Figure 3H) (Gu et al., 2012; Mateus-Pinheiro et al., 2017). In the context A,  
182 AP2 $\gamma^{+/-}$  mice exhibited reduced freezing behavior when exposed to a familiar context (Figure 3I).  
183 No alterations in the freezing behavior were observed neither in the context B (Figure 3J) nor in  
184 the cue probe (Figure 3K). These observations suggest that AP2 $\gamma^{+/-}$  mice exhibit deficits in  
185 contextual hippocampal-related memory, and an intact associative non-hippocampal-dependent  
186 memory when compared to WT littermates. Furthermore, experimental groups were also  
187 subjected to the MWM test for evaluation of spatial memory (Figure 4). In the reference memory  
188 task, that relies on hippocampal function integrity (Cerqueira et al., 2007), AP2 $\gamma^{+/-}$  and WT mice  
189 exhibit similar performance to reach the hidden platform along the training days (Figure 4A and  
190 B). When the platform was changed to the opposite quadrant to assess behavior flexibility, which  
191 relies not only in the hippocampal formation but also in prefrontal cortical areas (Hamilton and  
192 Brigman, 2015), adult AP2 $\gamma^{+/-}$  mice spent less time in the new quadrant than WT animals (Figure  
193 4C) suggesting that constitutive AP2 $\gamma$  deficiency leads to impaired behavioral flexibility. Detailed  
194 analysis of the strategies adopted to reach the escape platform (Antunes et al., 2020; Garthe et  
195 al., 2009; Garthe and Kempermann, 2013; Mateus-Pinheiro et al., 2017; Ruediger et al., 2012)  
196 revealed that AP2 $\gamma^{+/-}$  mice delayed the switch from non-hippocampal dependent ("Block 1") to  
197 hippocampal-dependent ("Block 2") strategies (Figure 4D-H), suggesting an impairment of  
198 hippocampal function. No differences were found in the working memory task (Supplementary  
199 Figure 4B and C).

200 Overall, results suggest that constitutive heterozygous deletion of AP2 $\gamma$  resulted in specific  
201 emotional and cognitive impairments at adulthood. More specifically, we observed that adult  
202 AP2 $\gamma^{+/-}$  mice display anxiety-like behavior, and cognitive impairments, in contextual memory,  
203 spatial memory and behavioral flexibility. Importantly, due to the relevance of hippocampal and  
204 mPFC to these behavioral tasks, results suggest that, in adult mice, the functional integrity of  
205 these brain areas is highly affected by constitutive and heterozygous deficiency of AP2 $\gamma$ .

206  
207



208 **Adult hippocampal-to-PFC functional connectivity is disrupted by constitutive AP2 $\gamma$**   
209 **heterozygous deficiency**

210         Given the impact of AP2 $\gamma$  deficiency on emotional and cognitive behavior, we sought for  
211 a functional correlate by investigating related neurocircuits. In adult WT and AP2 $\gamma^{+/-}$  mice, we  
212 explored the integrity of the dorsal hippocampus (dHip)-to-medial prefrontal cortex (mPFC)  
213 circuitry, assessing electrophysiological features of local field potentials (LFPs) simultaneously in  
214 these connected brain areas (Figure 5A and Supplementary Figure 5A). In AP2 $\gamma^{+/-}$  mice, the  
215 temporal structure of LFPs recorded simultaneously in the dHip and mPFC was affected.  
216 Specifically the spectral coherence between these regions (Adhikari et al., 2010; Oliveira et al.,  
217 2013; Sardinha et al., 2017) in AP2 $\gamma^{+/-}$  mice is significantly decreased in all frequency bands when  
218 compared to WT littermates (Figure 5B), indicating an impaired functional connectivity between  
219 these two brain regions in AP2 $\gamma^{+/-}$  mice. While in the dHip, constitutive AP2 $\gamma$  deficiency had a  
220 subtle impact in PSD values specifically in the Theta and Beta frequency bands (Figure 5C), in  
221 the mPFC, PSD values in all frequencies evaluated were significantly lower than WT mice (Figure  
222 5D).

223         Deficiency of AP2 $\gamma$  did not exert an effect neither in the spectral coherence between the  
224 vHip and the mPFC (Supplementary Figure 5B) nor in the PSD values in the vHip (Supplementary  
225 Figure 5C).

226         The electrophysiological studies revealed that constitutive and heterozygous AP2 $\gamma$   
227 deficiency led to two outcomes: first, a significant decrease of coherence between the dHip and  
228 the mPFC indicating impairments in the ability of these regions to functionally interact; second,  
229 this decrease in interregional coherence was accompanied by a diminished neuronal activity in a  
230 wide range of frequencies in the mPFC, including in theta and beta frequencies, previously shown  
231 to be critically related with behavioral outputs dependent on cortico-limbic networks (Colgin, 2011;  
232 Fell and Axmacher, 2011; Oliveira et al., 2013).

233



## 234 **Discussion:**

235           Herein, we show that despite a normal early postnatal acquisition of neurodevelopmental  
236 milestones, constitutive and heterozygous deficiency of AP2 $\gamma$  induces an anxiety-like state and  
237 causes cognitive deficits in mice that persist from adolescence until adulthood. Our results  
238 suggest that AP2 $\gamma$  plays a crucial role for the proper development and maturation of neural circuits  
239 implicated in emotional and cognitive functions.

240           Newly generated neurons are highly relevant to hippocampal functioning and  
241 hippocampal-associated behaviors (Anacker and Hen, 2017; Christian et al., 2014; Fang et al.,  
242 2018; Gonçalves et al., 2016). Impairments in adult hippocampal neurogenesis precipitate the  
243 emergence of depressive- and anxiety-like behaviors (Bessa et al., 2009; Hill et al., 2015; Mateus-  
244 Pinheiro et al., 2013b, 2013a; Revest et al., 2009; Sahay and Hen, 2007). Here, we assessed the  
245 longitudinal impact of AP2 $\gamma$ , a transcription factor that plays an important role on embryonic  
246 neuronal development (Pinto et al., 2009) and recently described as a novel regulator of adult  
247 hippocampal neurogenesis (Mateus-Pinheiro et al., 2018, 2017), on neural plasticity, function and  
248 behavior at different postnatal periods. Characterization of the neurogenic process in the  
249 hippocampal DG in juvenile and adult AP2 $\gamma^{+/-}$  mice, revealed that in agreement with a previous  
250 report in a conditional knock-out mice (Mateus-Pinheiro et al., 2017), AP2 $\gamma$  regulates upstream  
251 neurogenic regulators as Pax6 and Tbr2. Other modulators of the TAP's population, such as Ngn2  
252 and Tbr2, have been shown to exert a similar control of hippocampal neurogenesis. Ngn2 has  
253 been implicated in the proper development of the DG, and its deletion at early stages of  
254 development leads to a reduction in neurogenesis (Galichet et al., 2008; Roybon et al., 2009).  
255 Moreover, Tbr2 is critically required for hippocampal neurogenesis in the developing and adult  
256 mice, with its postnatal inactivation resulting in a marked reduction in neuroblasts (Hodge et al.,  
257 2012), and its conditional deletion in the adult hippocampal neurogenic niche leading to a specific  
258 blockade of the neurogenic process (Tsai et al., 2015). Also, we observed that, at both postnatal  
259 periods, AP2 $\gamma$  plays an essential role in the regulation of pivotal neurogenic steps as NSCs  
260 proliferation and neuronal maturation (Mateus-Pinheiro et al., 2017), while the morphology of  
261 granular neurons in the hippocampal DG, another form of hippocampal structural plasticity, is  
262 intact (Bessa et al., 2009; Mateus-Pinheiro et al., 2013a).

263           Taking into consideration the embryonic and early postnatal developmental modulatory  
264 roles of AP2 $\gamma$ , and the severe and/or lethal malformations during development promoted by  
265 deficiencies in other members of the AP2 family (AP2 $\alpha$  and AP2 $\beta$ ) (Lim et al., 2005; Moser et al.,  
266 1997; Schorle et al., 1996), we sought to understand whether constitutive and heterozygous  
267 deficiency of AP2 $\gamma$  could lead postnatally to functional and behavioral impairments. The  
268 developmental milestones protocol showed no impact of the constitutive heterozygous deficiency  
269 of AP2 $\gamma$  in early postnatal neurodevelopment. Nevertheless, this deficiency in AP2 $\gamma$  promotes

270 emotional and cognitive behavior in later periods of life. At juvenile age, AP2 $\gamma$  deficiency led to  
271 the manifestation of anxiety-like behavior and significant impairments in recognition memory  
272 tasks, that depend on the integrity of the hippocampal circuitry (Jessberger et al., 2009).  
273 Interestingly, anxiety-like behavior and cognitive impairments were maintained at adulthood,  
274 where adult AP2 $\gamma^{+/-}$  mice displayed poor performances in hippocampal-dependent tasks (Garthe  
275 et al., 2009; Garthe and Kempermann, 2013; Gu et al., 2012; Ruediger et al., 2012). Notably,  
276 conditional deletion of AP2 $\gamma$  in adulthood lead to a less evident effect on emotional behavior,  
277 namely in anxiety-like behavior tested in the OF and EPM behavioral tests, when comparing with  
278 the constitutive mice model herein presented (Mateus-Pinheiro et al., 2017). This result indicates  
279 that constitutive deficiency of AP2 $\gamma$  may exert a longitudinal cumulative impact leading to more  
280 severe alterations in behavioral performance of mice, whereas in the conditional model during  
281 adulthood, the AP2 $\gamma$  deletion only occurs in a subset of newly formed neuroblasts.

282 Our results are consistent with previous publications were the suppression of the TAP's  
283 regulator Tbr2 exerted both an anxiety-like phenotype during the juvenile period, and induced  
284 cognitive deficits during early adulthood (Veerassamy et al., 2020). Moreover, Ngn2 is also  
285 important for the modulation of cognitive behavior, namely in the rescue of cognitive function in  
286 the T-Maze task. Interestingly, the regulation of TAPs' by AP2 $\gamma$  seems to be also important for the  
287 preservation of cognitive performance as shown by its impact on hippocampal-dependent tasks.  
288 Behavioral flexibility, a cognitive task that relies on the interaction of the hippocampal and  
289 prefrontal cortical brain areas, was impaired in AP2 $\gamma^{+/-}$  mice. Adult AP2 $\gamma^{+/-}$  mice present significant  
290 deficits of electrophysiological coherence between the dHip and the mPFC. In particular,  
291 constitutive AP2 $\gamma$  deficiency led to a decrease of the spectral coherence between the recorded  
292 brain areas in a wide range of frequencies, previously associated to behavior outputs dependent  
293 on cortico-limbic networks (Colgin, 2011; Fell and Axmacher, 2011; Oliveira et al., 2013; Sardinha  
294 et al., 2017). The integrity of the hippocampus-to-PFC circuitry was described to be relevant for  
295 example to the action of antidepressants, such as ketamine (Carreno et al., 2016), which promote  
296 neurogenesis, suggesting that AP2 $\gamma$  may be involved in conserving this neuronal circuit.  
297 Additionally, AP2 $\gamma$  plays an important role on cortical basal progenitors' specification during  
298 embryonic development (Pinto et al., 2009) that might be affecting the electrophysiological  
299 function of the mPFC. In fact, AP2 $\gamma^{+/-}$  mice presented impaired neuronal activity in the mPFC in  
300 all frequency ranges, as detected by the general decrease of PSD signals recorded, and  
301 corroborated by previous findings (Mateus-Pinheiro et al., 2017). Thus, misspecification of upper  
302 cortical layers promoted by AP2 $\gamma$  deficiency since embryonic development may be contributing to  
303 the functional electrophysiological readouts, and also eliciting the cognitive defects herein  
304 observed.

305           Collectively, the results presented in this study demonstrated the importance of the  
306 transcription factor AP2 $\gamma$  in the generation of glutamatergic neurons in the postnatal brain and its  
307 impact on functional behavioral dimensions at different postnatal periods. Following these  
308 findings, future experiments should be implemented to elucidate whether AP2 $\gamma$  can participate in  
309 the pathogenesis and treatment of neurodevelopmental and/or psychiatric disorders and how it  
310 may exert its modulatory action.  
311

312 **Materials and methods:**

313 **Key Resource Table**

| Reagent or Resource                                          | Source                     | Identifier                   |
|--------------------------------------------------------------|----------------------------|------------------------------|
| <b>Experimental model: Organisms/strains</b>                 |                            |                              |
| <i>Mus musculus</i> , mice maintained in a 129/SV background | Dr. Hubert Schorle         | NA                           |
| <b>Injectables</b>                                           |                            |                              |
| BrdU, 50 mg/kg                                               | Sigma-Aldrich              | # 9285                       |
| <b>Antibodies</b>                                            |                            |                              |
| <u>Western blot</u>                                          |                            |                              |
| alpha-tubulin, mouse                                         | Sigma                      | #5168                        |
| AP2 $\gamma$ , goat                                          | Abcam                      | #31288                       |
| Pax6, rabbit                                                 | Millipore                  | #2237<br>RRID:AB_1587367     |
| Sox2, mouse                                                  | Abcam                      | #7935                        |
| Anti-mouse                                                   | BioRad                     | #1706516<br>RRID:AB_11125547 |
| Anti-rabbit                                                  | BioRad                     | #1706515<br>RRID:AB_11125142 |
| Anti-goat                                                    | Santa-Cruz Biotechnologies | #A2216                       |
| SuperSignal west Femto reagent                               | ThermoFisher,              | #34096                       |
| <u>Immunofluorescence</u>                                    |                            |                              |
| BrdU, rat                                                    | Abcam                      | #6326<br>RRID:AB_305426      |
| Doublecortin, rabbit                                         | Abcam                      | #18723<br>RRID:AB_732011     |
| Alexa Fluor 488 Goat Anti-rat                                | Invitrogen                 | #32731                       |
| Alexa Fluor 568 Goat Anti-rabbit                             | Invitrogen                 | #11011<br>RRID:AB_143157     |
| 4',6-diamidino-2-phenylindole (DAPI)                         | Sigma Aldrich              | #8417                        |
| <b>Software</b>                                              |                            |                              |
| Activity Monitor software                                    | MedAssociates              | NA                           |
| Kinoscope software                                           | (Kokras et al., 2017)      | NA                           |
| Ethovision XT 11.5                                           | Noldus                     | RRID:SCR_000441              |
| Signal Software                                              | CED                        | NA                           |
| Prism v.8                                                    | GraphPad Software Inc      | RRID:SCR_002798              |
| MATLAB                                                       | MathWorks Inc              | RRID:SCR_005547              |

314

315 **Experimental model details:**

316 Wild-type (WT) and AP2 $\gamma$  heterozygous KO (AP2 $\gamma$ <sup>+/-</sup>) mice were maintained in a 129/SV  
 317 background and identified by polymerase chain reaction (PCR) of genomic DNA. Along the study,  
 318 distinctive at cohorts (at least 2 *per* timepoint) of littermate WT and AP2 $\gamma$ <sup>+/-</sup> male mice were

319 submitted to molecular (n = 4-6 *per group*), behavioral (n = 8-16 *per group*) and  
320 electrophysiological (n= 5-6 *per group*) assessment at the different postnatal ages (early postnatal  
321 period: between postnatal day (PND) 1 and 21; juvenile period: from PND 25 to 31; adulthood:  
322 PND 70 to 92).

323 All mice were housed and kept under standard laboratory conditions at  $22 \pm 1^\circ\text{C}$ , 55%  
324 humidity, and *ad libitum* access to food and water on a 12h light/dark cycle (lights on 8 A.M. to 8  
325 P.M.). Efforts were made to minimize the number of animals and their suffering. All experimental  
326 procedures performed in this work were conducted in accordance with the EU Directive  
327 2010/63/EU and approved by the Portuguese National Authority for animal experimentation,  
328 *Direção-Geral de Alimentação e Veterinária* (DGAV) with the project reference  
329 0420/000/000/2011 (DGAV 4542).

330

### 331 **Behavioural analysis:**

#### 332 ***Developmental milestones protocol***

333 Early postnatal neurodevelopment in mice was assessed according to previously  
334 validated protocols (Castelhano-Carlos et al., 2010; Guerra-Gomes et al., 2020; Hill et al., 2008;  
335 Santos et al., 2007). This consisted in a daily evaluation for the first 21 days of life. From postnatal  
336 day (PND) 1 onward, newborn animals were evaluated in several parameters, including skin  
337 appearance, activity, and presence of milk spot in the stomach, indicator of correct maternal care  
338 and well-being. Pups were examined for the acquisition of developmental milestones until  
339 weaning (PND21), every day at the same time, in the same experimental room, by the same  
340 experimenter. This daily scoring included tests to assess the acquisition of mature response  
341 regarding somatic parameters and neurobiological reflexes.

#### 342 *Somatic parameters:*

343 As a measure of morphological development, animals were daily weighed (weight  $\pm 0.01$   
344 g). The eye-opening day was also evaluated and considered when both eyes were opened. When  
345 both eyes opened on different days, score was set as 1 if only one of the eyes was open, and 2  
346 when both eyes were open. The mature response was registered when both eyes were open.

347

#### 348 *Neurobiological reflexes:*

349 The assessment of the neurobiological reflexes including the daily performance of  
350 different tests. Of note, the scale of evaluation was distinct among tests. Tests including rooting,  
351 ear twitch, auditory startle, open field transversal, air righting, wire suspension, postural reflex  
352 were scored according to the absence (0) or presence (1) of a mature response. When possible,  
353 to detect a gradual progression in performance as for walking, surface righting, grasping, negative  
354 geotaxis, cliff aversion, daily score was attributed between 0 and 3, with 0 representing absence,  
355 and 3 corresponding to the achievement of the mature response. The postnatal day in which

356 animals achieved a mature response was registered. All tests were conducted in a smooth foam  
357 pad, and immediately after testing, the pups were returned to their home cage.

358 *Labyrinthine reflex, body righting mechanism, coordination and strength:*

359 *Surface righting reflex* – PND1 to PND13 – This test consists of gently laying the animal  
360 on its back, and the mature response was considered when the pup was able to get right. If the  
361 animal did not respond within 30 s, the test was ended. Mature response was achieved when the  
362 pups were able to get right in less than 1 s for three consecutive days.

363 *Negative geotaxis* – PND1 to PND 14 – Pups were placed head down in a horizontal grid,  
364 tilted 45° to the plane. The acquisition of a mature response was set when pups were able to head  
365 up in less than 30 s for three consecutive days.

366 *Air righting* – PND8 to PND 21 – In this test, the pup was held upside down and released  
367 from a height of approximately 13 cm from the soft padded surface and released. A mature  
368 response was obtained when the animals landed on four paws for three consecutive days.

369 *Cliff aversion* – PND 1 to PND 14 – It evaluates the mouse pup's ability to turn and crawl  
370 away when on the edge of a cliff. A mature response was achieved once the animal moved away  
371 in less than 30 s for three consecutive days.

372 *Postural reflex* – PND 5 to PND 21 – Pups were placed in a small plastic box and gently  
373 shaken up down and right. When the animals were able to maintain their original position in the  
374 box by extending four paws, mature response was acquired.

375 *Wire suspension* – PND 5 to PND 21 – This test evaluates forelimb grasp and strength.  
376 Pups were placed vertically to hold with their forepaws a 3 mm diameter metal wire suspended 5  
377 cm above a soft foam pad. A mature response was achieved once the animal was able to grasp  
378 the bar, holding it with four paws.

379 *Grasping* – PND 5 to PND 21 – The mouse pup forelimb was stimulated with a thin wire  
380 to evaluate when the involuntary freeing reflex stopped. This reflex disappears with the  
381 development of the nervous system, as so, the mature response achieved when the animal  
382 grasped immediately and firmly the wire.

383

384 *Tactile reflex:*

385 *Ear twitch* – PND 7 to PND 15 – In this test, the mouse pup ear was gently stimulated with  
386 the tip of a cotton swab, three times. If the animal reacted, flattening the ear against the side of  
387 the head for three consecutive days, the mature response was reached.

388 *Rooting* – PND 7 to PND 12 – A fine filament of a cotton swab was used to gently and  
389 slowly rub the animal's head, from the front to the back. It was considered a successful test if the  
390 pup moved its head towards the filament. The test was repeated on the other side of the head to  
391 evaluate the appearance of this neurobiological reflexes on both sides. If the animal did not react

392 to the filament, the test was repeated. Mature response was obtained when animal reacted on  
393 both sides for 3 consecutive days.

394

395 *Auditory reflex:*

396 *Auditory startle* – PND7 to PND 18 – We evaluated the reaction of pups to a handclap, at  
397 a distance of 10 cm. If pups quick and involuntary jumped for three consecutive days, a matured  
398 response was attributed.

399

400 *Motor:*

401 *Open field transversal* – PND7 to PND 18 – To execute this test, animals were placed in  
402 a small and circle (13 cm diameter), and time to move was recorded. If the pup was not able to  
403 move, the test was ended. In case the mouse leaves the circle in less than 30 s, in three  
404 consecutive days, a mature response was reached.

405 *Walking* – PND 5 to PND 21 – In this paradigm, animals were able to freely move around  
406 for 60 s. The mature response was achieved when they showed a walking movement fully  
407 supported on 4 limbs.

408

409 ***Open field (OF) test***

410 The OF test is a behavioral test commonly used to assess anxiety-like behavior,  
411 exploratory behavior, and general activity in rodents. This apparatus consists of a highly  
412 illuminated square arena of 43.2x43.2cm, closed by a 30.5 cm high wall. Mice were individually  
413 placed in the center of the OF arena, and their movement was tracked for 5 mins, using a 16-  
414 beam infrared system (MedAssociates, US). Data was analysed using the Activity Monitor  
415 software (MedAssociates, US). Average velocity of the animals was considered as a measure of  
416 locomotor capacity, and the activity ratio between the center and the arena periphery was  
417 considered as measurement of anxiety-like behavior.

418

419 ***Elevated-plus maze (EPM) test***

420 To study the impact on anxiety-like behavior the EPM test was also performed (Walf and  
421 Frye, 2007). This consists of a black propylene apparatus (ENV – 560; MedAssociates Inc, US)  
422 with two opposite open arms (50.8 cm × 10.2 cm) and two closed arms (50.8 cm × 10.2 cm × 40.6  
423 cm) elevated 72.4 cm above the floor and dimly illuminated. The central area connecting both  
424 arms measured 10x10 cm. Animals were individually positioned in the center of the maze, facing  
425 an edge of a closed-arm, and were allowed to freely explore the maze for 5 min. All trials were  
426 recorded using an infrared photobeam system, and the percentage of time spent in the open arms  
427 was accessed through the EthoVision XT 11.5 tracking system (Ethovision, Noldus Information  
428 Technologies, Netherlands).



429 ***Forced swimming test (FST)***

430 For the assessment of behavioral-despair, we performed the forced swimming test  
431 (Porsolt et al., 1977). Briefly, each animal was individually placed in glass cylinders filled with  
432 water (23°C; depth 30 cm) for 5 min. All sessions were video-recorded, and the immobility time,  
433 defined through a video tracking software Ethovision XT 11.5 (Noldus, Netherlands), was  
434 considered as a measure of learned-helplessness. Mice were considered immobile when all  
435 active behaviors (struggling, swimming, and jumping) were ceased. For immobility, the animals  
436 had to remain passively floating or making minimal movements need to maintain the nostrils  
437 above water. For learned-helplessness assessment, the first 3 min of the trial were considered  
438 as a habituation period and the last 2 min as the test period.

439

440 ***Tail-suspension test (TST)***

441 The TST is a commonly used behavioral test to assess behavioral despair in rodents. The  
442 principle of this behavioral paradigm is similar to the FST assessing also learned helplessness of  
443 the animals. For this, animals were suspended by the tail to the edge of a laboratory bench 80  
444 cm above the floor (using adhesive tape) for 6 min. Trials were video-recorded, and the immobility  
445 and climbing times were automatically analyzed by the video tracking software Ethovision XT 11.5  
446 (Noldus, Netherlands). For the learned-helplessness assessment, the first 3 min of the trial was  
447 considered as a habituation period, and the last 3 min as the test period.

448

449 ***Splash-sucrose test (SCT)***

450 The splash-sucrose test consists of spraying a 10 %sucrose solution on the dorsal coat of  
451 mice in their home cage (Yalcin et al., 2008). Sucrose solution in the mice's coat induces grooming  
452 behavior. After spraying the animals, animal was video-recorded for 5 min and the time spent  
453 grooming was taken as an index of self-care and motivational behavior. Then, the videos were  
454 manually analyzed using the behavioral scoring program Kinoscope (Kokras et al., 2017).

455

456 ***Object recognition test (ORT)***

457 Through this behavioral paradigm we assessed short- and long-term memory (Leger et  
458 al., 2013). This test relies on rodents' nature to explore and prefer novelty. For that, mice were  
459 acclimatized to a testing arena (30 cm x 30 cm x 30 cm) under dim light for 3 days during 20 min.  
460 After habituation, animals were presented with two equal objects for 10 min (training), positioned  
461 in the center of the arena. Then, 1 h later, one of the objects was moved towards one arena wall,  
462 and mice were allowed to freely explore the objects for 10 mins. On the following day, animals  
463 returned to the arena for 10 mins, with one of the objects replaced by a novel object. The familiar  
464 and novel objects had different size, color, shape and texture. Between trials, the arena and  
465 objects were properly cleaned with 10% ethanol. Sessions were recorded and manually scored

466 through the behavioral scoring program Kinoscope (Kokras et al., 2017). The percentage of time  
467 exploring the moved- and novel-object was used as a measure of short- and long-term memory,  
468 respectively.

469

#### 470 **Contextual-fear conditioning (CFC)**

471 The CFC test was performed in a white acrylic box with internal dimensions of 20 cm wide,  
472 16 cm deep, and 20.5 cm high (MedAssociates). This apparatus had a fixed light bulb mounted  
473 directly above the chamber to provide a source of illumination. Each box contained a stainless-  
474 steel shock grid floor inside a clear acrylic cylinder, where the animals were placed. All animals  
475 were exposed to two probes: a context probe and a cue (light) probe, as previously described (Gu  
476 et al., 2012; Mateus-Pinheiro et al., 2017). All probes were recorded, and the freezing behavior  
477 was manually scored through Kinoscope (Kokras et al., 2017). This behavioral paradigm took 3  
478 days.

479 Day 1: Animals were individually placed in the conditioning-white box (Context A) and  
480 received three pairings between a light (20 s) and a co-terminating shock (1 s, » 0.5 mA). The  
481 interval between pairings was 180 s, and the first light presentation started 180 s after the  
482 beginning of the trial. After the three pairings, mice remained in the acrylic box for 30 s, being  
483 after returned to their home cage. Between animals, the apparatus was properly cleaned with  
484 10% ethanol.

485 Day 2: For the context probe, animals were placed into the same white acrylic chamber  
486 (context A), 24h hours after the light-shock pairings. The freezing behavior was monitored for 3  
487 min. Two hours later, we introduced the animals into a modified version of the chamber (Context  
488 B). This new box was sheeted with a black plasticized cover, sprayed with a vanilla scent. In this  
489 way, both contexts had distinct spatial and odor cues. Also in Context B, the ventilation was not  
490 operated, and the experimenter wore a different color of gloves and a lab coat. Freezing behavior  
491 was measured for 3 min. The freezing behavior state was defined as the total absence of motion,  
492 for a minimum of 1 s.

493 Day 3: For the cue probe, the animals were set in Context B, and individually placed in this  
494 chamber 24h after the context probe. After 3 min, the light was turned on for 20 s, and the freezing  
495 behavior monitored for 1 min after light is turned off.

496

#### 497 **Morris water maze (MWM)**

498 In the MWM test, several cognitive domains were assessed: working- and spatial-  
499 reference memory and behavioral flexibility. Additionally, the strategies used to reach the platform  
500 were also analyzed. MWM was performed in a circular white pool (170 cm diameter) filled with  
501 water at 22°C to a depth of 31 cm in a room with and dim light and extrinsic clues (triangle, square,  
502 cross, and horizontal stripes). The pool was divided into four quadrants by imaginary lines, and a

503 clear-acrylic cylinder platform (12 cm diameter; 30 cm high), placed in one of the quadrants. All  
504 trials were video recorded by a tracking system (Viewpoint, France).

505

506 *Working memory task:*

507 The working memory task (Alves et al., 2017; Cerqueira et al., 2007) evaluates the  
508 cognitive domain that relies on the interplay between the hippocampal and prefrontal cortex (PFC)  
509 functions. In this task, animals had to learn the position of the hidden platform and to retain this  
510 information for four consecutive daily trials. The task was performed during 4 days and in a  
511 clockwise manner the platform was repositioned in a new quadrant each day. During the daily  
512 trials, animals had different starting positions (north, east, west, and south). Trials ended when  
513 the platform was reached within the time limit of 120 s. If the animals did not reach the platform  
514 during the trial time, they were guided to the platform and allowed to stay for 30 s. The time and  
515 path to reach the platform were recorded.

516

517 *Reference memory task:*

518 After working memory evaluation (days 1-4), spatial-reference memory, a hippocampal  
519 dependent-function, was assessed by keeping the platform in the same quadrant during three  
520 consecutive days (days 4-6) (Morris, 1984). The time and path to reach the platform were  
521 recorded for each trial.

522

523 *Reversal learning task:*

524 On the last day of MWM testing, reversal-learning performance, a PFC dependent  
525 function, was assessed. This was conducted by positioning the platform in a new (opposite)  
526 quadrant. Animals were tested in 4 trials. The percentage of time spent in the new and old  
527 quadrant containing the platform was used as readout of behavioral flexibility.

528

529 *Search strategies analysis:*

530 Throughout the Morris water maze, animals were evaluated through the adopted  
531 strategies to reach the hidden platform, as previously described (Garthe and Kempermann, 2013;  
532 Mateus-Pinheiro et al., 2017; Ruediger et al., 2012). Quantitative analyses and strategy  
533 classification were completed by assessing different parameters collected through the Viewpoint  
534 software: (1) thigmotaxis (Tt): most of the swim distance (>70%) happened within the outer ring  
535 area (8 cm from the pool border); (2) random swim (RS): most of the swim distance (>80%)  
536 occurred within the inner circular area, and all quadrants were explored with a percentage of swim  
537 distance not below 50% for none of the quadrants; non-circular trajectories; (3) scanning (Sc):  
538 most of the swim pattern and distance (>80%) happened within the inner circular area, with  
539 balanced exploration in all quadrants of the pool; non-circular trajectories, with a percentage

540 (<60%) of swim distance in the platform corridor area (area centered along the axis that connects  
541 the start position and the hidden platform); (4) chaining (Ch): the majority of the swim distance  
542 occurred in the inner circular area (>80%), with a balanced exploration of all pool quadrants; swim  
543 distance in the platform corridor area <60%, with circular trajectories taking place; (5) directed  
544 search (DS): the majority of the swim distance occurred in the inner circular area (>80%); swim  
545 distance in the platform corridor area >60%, with shifts in the trajectories directions; (6) focal  
546 search (FS): directed trajectories to the platform zone, with swim exploration within the perimeter  
547 of the escape platform (30cm); (7) directed swim (DSw): directed trajectories to the hidden  
548 platform, without much exploration of the pool. For simplification, we defined two blocks of  
549 strategies: Block 1, that comprises the “non-hippocampal dependent strategies” (Tt, RS, and Sc),  
550 and Block 2, comprising the defined “hippocampal dependent strategies” (DS, FS, and DSw).  
551 These blocks were defined when a sequence of at least three trials within the same block were  
552 reached.

553

#### 554 **Electrophysiological studies**

555 Electrophysiological recordings were obtained from anesthetized mice (sevoflurane  
556 2,5%; 800 mL/min). A surgical procedure was performed to insert platinum/iridium concentric  
557 electrodes (Science Products) in the target positions following the mouse brain atlas (from  
558 Paxinos): prelimbic region of the medial prefrontal cortex (mPFC): 1.94 mm anterior to bregma,  
559 0.4 mm lateral to the midline, 2.5 mm below bregma; dorsal hippocampus (dHIP): 1.94 mm  
560 posterior to bregma, 1.2 mm lateral to the midline, 1.35 mm below bregma); ventral hippocampus  
561 (vHIP): 3.8 mm posterior to bregma, 3.3 mm lateral to the midline, 3.4 mm below bregma). LFP  
562 signals obtained from mPFC, dHIP, and vHIP were amplified, filtered (0.1–300 Hz, LP511 Grass  
563 Amplifier, Astro-Med), acquired (Micro 1401 mkII, CED) and recorded through the Signal Software  
564 (CED). Local field activity was recorded at the sampling rate of 1000 Hz during 100s. After  
565 electrophysiological recordings, a biphasic 0.7 mA stimulus was delivered to mark the recording  
566 sites. Then, mice were deeply anesthetized with sodium pentobarbital, brains removed, immersed  
567 in paraformaldehyde (PFA) 4% for 48h and sectioned (50  $\mu$ m) in the vibratome. Coronal slices  
568 containing the mPFC, dHip vHip were stained for Cresyl Violet to check for recording sites.  
569 Animals with recording positions outside at least in one of the two regions under study (mPFC  
570 and dHip or vHip) were excluded from the analysis. Coherence analysis was based on multi-taper  
571 Fourier analysis.

572 Coherence was calculated by custom-written MATLAB scripts, using the MATLAB  
573 toolbox Chronux (<http://www.chronux.org>) (Mitra and Pesaran, 1999). Coherence was calculated  
574 for each 1 s long segments and their mean was evaluated for all frequencies from 1 to 90 Hz. The  
575 power spectral density (PSD) of each channel was calculated through the  $10 \times \log$  of the  
576 multiplication between the complex Fourier Transform of each 1s long data segment and its

577 complex conjugate. The mean PSD of each channel was evaluated for all frequencies from 1 to  
578 90 Hz (Oliveira et al., 2013). Both coherence and PSD measurements were assessed in the  
579 following frequencies: delta (1–4 Hz), theta (4–12 Hz), beta (12–20 Hz); low (20–40 Hz) and high  
580 gamma (40-90 Hz).

581

## 582 **BrdU labelling**

583 To assess the effect of AP2 $\gamma$  heterozygous deletion on the proliferation of fast-dividing  
584 progenitor cells, and its impact on the generation of adult-born neurons, animals from all groups  
585 were injected intraperitoneally with the thymidine analogous 5-bromo-2'-deoxyuridine or  
586 bromodeoxyuridine (BrdU, 50 mg/kg; Sigma-Aldrich, US) that is incorporated in the DNA during  
587 the S-phase. BrdU injections were performed once, at the end of the behavioral assessment, 24  
588 h prior to occision.

589

## 590 **Western Blot analysis**

591 Hippocampal DG of juvenile and adult AP2 $\gamma$ <sup>+/-</sup> mice and WT littermates were carefully  
592 macrodissected out after occision. The tissue was weighted and homogenized in RIPA buffer  
593 [containing 50mM Tris HCl, 2 mM EDTA, 250 mM NaCl, 10 % glycerol, 1 mM PMSF protease  
594 inhibitors (Roche, Switzerland)] and then sonicated (Sonics & Materials, US) for 2 min. Samples  
595 were centrifuged for 25 min at 10.000 rpm and 4°C. The protein concentration of the supernatant  
596 was determined using Bradford assay. Samples with equal amounts of protein, 30  $\mu$ g, were  
597 analyzed using the following primary antibodies: alpha-tubulin (#5168; Sigma, mouse, 1:5000),  
598 AP2 $\gamma$  (#31288; goat, 1:500; Abcam, UK), Pax6 (#2237; rabbit, 1:1000; Millipore, US), Sox2  
599 (#7935; mouse, 1:500; Abcam, UK) and Tbr2 (#2283; rabbit, 1:500; Millipore, US). Secondary  
600 antibodies were used from BioRad (Anti-mouse, 1:10.000; #1706516; Anti-rabbit, 1:10.000;  
601 #1706515, US) and Santa-Cruz Biotechnologies (Anti-goat, 1:7500; #A2216, US). Membranes  
602 were developed using SuperSignal west Femto reagent (#34096; ThermoFisher, US) and  
603 developed in Sapphire Biomolecular Imager from Azure Biosystems (US). After developing,  
604 images were quantified using AzureSpot analysis software (Azure Biosystems, US).

605

## 606 **Immunostaining procedures**

607 All mice were deeply anesthetized and then transcardially perfused with cold 0.9% NaCl,  
608 followed by 4% paraformaldehyde (PFA). Brains were carefully removed from the skull, postfixed  
609 in 4% PFA, and then cryoprotected in 30% sucrose solution. The brains were coronally processed  
610 at the vibratome (Leica VT 1000S, Germany) with a thickness of 50  $\mu$ m, extending over the entire  
611 length of the hippocampal formation. Coronal sections containing the hippocampal dentate gyrus  
612 (DG) were further stained to assess cell proliferation and the population of neuroblasts. For that



613 purpose, brain sections were double stained for BrdU (#6326; rat, 1:100; Abcam, UK) and  
614 doublecortin (DCX; #18723; rabbit, 1:100; Abcam, UK). Appropriate secondary fluorescent  
615 antibodies were used (Alexa Fluor 488 Goat Anti-rat, #32731; 1:1000; Invitrogen, US; and Alexa  
616 Fluor 568 Goat Anti-rabbit, #11011; 1:1000; Invitrogen, US). For Cell nuclei labeling, 4',6-  
617 diamidino-2-phenylindole (DAPI, 1:200; Sigma Aldrich) was used. The density of each cell  
618 population in the DG was determined by normalizing positive cells with the corresponding area.  
619 Analysis and cell counting were performed using a confocal microscope (Olympus FluoView™  
620 FV1000, Hamburg, Germany) and an optical microscope (Olympus BX51). The observer was  
621 blind to the experimental condition of each subject. Data are reported as the number of cells *per*  
622 100  $\mu\text{m}^2$ .

623

### 624 **3D morphological analysis**

625 To evaluate the 3D dendritic morphology of pre-existing granule neurons in the DG we  
626 performed impregnation with Golgi-Cox technique in brain sections from juvenile and adult mice.  
627 Briefly, brains were immersed in Golgi-Cox solution for 14 days and then transferred to 30%  
628 sucrose. Coronal sections (200  $\mu\text{m}$ ) were cut on a vibratome (Leica VT100S, Germany), collected  
629 and then blotted dry onto gelatine-coated microscope slides. Sections containing the dorsal  
630 hippocampus were then alkalinized in 18.8% ammonia, developed in Dektol (Kodak, US), fixed  
631 in Kodak Rapid Fix, dehydrated and xylene cleared. Dendritic arborization was analyzed in the  
632 DG of WT and AP2 $\gamma^{+/-}$  animals (10 neurons *per* animal).

633

### 634 **Data analysis and statistics**

635 Statistical analysis was performed using Prism v.8 (GraphPad Software, US). Animals  
636 were randomly assigned to groups, balanced by genotypes. Sample sizes were determined by  
637 power analyses based on previously published studies (Mateus-Pinheiro et al., 2017) and normal  
638 distributions were assessed using the Shapiro-Wilk statistical test, taking into account the  
639 respective histograms and measures of skewness and kurtosis. To variables that followed the  
640 Gaussian distribution within groups, parametric tests were applied, while non-parametric tests  
641 were used for discrete variables. To compare the mean values for two groups, a two-tailed  
642 independent-sample t-test was applied. For comparisons between two time-points a two-way  
643 ANOVA was used. For longitudinal analyses (across days and different trials) a repeated  
644 measures ANOVA was used.

645 For the comparison of categorical variables (strength to grab, limb grasping and clasping),  
646 crosstabulations were performed and the statistical test used was Fisher's exact test (when  
647 Pearson Qui-Squared assumptions were not met).

648 Data is expressed either as mean  $\pm$  SEM (standard error of the mean), as median, or as  
649 percentage, as stated in the figures' legends. Statistical significance was set when  $p < 0.05$ .

650

### 651 **Acknowledgments and funding**

652 E.L.C., N.D.A., A.M.P., P.P., C.S.C., J.S., T.S.R., B.M.P., J.F.O., and L.P. received  
653 fellowships from the Portuguese Foundation for Science and Technology (FCT) (IF/00328/2015  
654 to J.F.O.; 2020.02855.CEECIND to LP). This work was funded by FCT (IF/01079/2014,  
655 PTDC/MED-NEU/31417/2017 Grant to JFO), BIAL Foundation Grants (037/18 to J.F.O. and  
656 427/14 to L.P.) and Nature Research Award for Driving Global Impact - 2019 Brain Sciences (to  
657 L.P.). This was also co-funded by the Life and Health Sciences Research Institute (ICVS), and by  
658 FEDER, through the Competitiveness Internationalization Operational Program (POCI), and by  
659 National funds, through the Foundation for Science and Technology (FCT) - project  
660 UIDB/50026/2020 and UIDP/50026/2020. Moreover, this work has been funded by ICVS  
661 Scientific Microscopy Platform, member of the national infrastructure PPBI - Portuguese Platform  
662 of Bioimaging (PPBI-POCI-01-0145-FEDER-022122; by National funds, through the Foundation  
663 for Science and Technology (FCT) - project UIDB/50026/2020 and UIDP/50026/2020.

664

### 665 **Author contributions**

666 E.L.C. and N.D.A. maintained the AP2 $\gamma^{+/-}$  colony, genotyping and conducted all  
667 behavioral tests, molecular and immunohistological analyses. E.L.C. and N.D.A. also completed  
668 all the analyses and interpreted the results. P.P. assisted in the ocision of the animals and  
669 performed the macrodissection of all analyzed brain areas. C.S.C. and J.S assisted in the western  
670 blots. A.M.P. helped with cognitive assessment and analyses. E.L.C., N.D.A., C.S.C., and V.M.S.  
671 collected and analyzed the electrophysiology results. T.S.R. assisted colony maintenance and  
672 genotyping. B.M.P conducted and helped with cognitive assessment and analysis. J.F.O.  
673 interpreted the electrophysiological data. E.L.C., N.D.A., and L.P. designed the study, planned  
674 the experiments, and wrote the manuscript. E.L.C., N.D.A., A.J.R., J.F.O., N.S. and L.P. edited  
675 the manuscript.

676

### 677 **Competing interests**

678 The authors declare that they have no competing interests.

679

680



## 681 **References**

- 682 Adhikari A, Topiwala MA, Gordon JA. 2010. Synchronized Activity between the Ventral  
683 Hippocampus and the Medial Prefrontal Cortex during Anxiety. *Neuron* **65**:257–269.  
684 doi:10.1016/j.neuron.2009.12.002
- 685 Alves ND, Correia JS, Patrício P, Mateus-Pinheiro A, Machado-Santos AR, Loureiro-Campos E,  
686 Morais M, Bessa JM, Sousa N, Pinto L. 2017. Adult hippocampal neuroplasticity triggers  
687 susceptibility to recurrent depression. *Transl Psychiatry* **7**:e1058–e1058.  
688 doi:10.1038/tp.2017.29
- 689 Anacker C, Hen R. 2017. Adult hippocampal neurogenesis and cognitive flexibility — linking  
690 memory and mood. *Nat Rev Neurosci* **18**:335–346. doi:10.1038/nrn.2017.45
- 691 Antunes C, Da Silva JD, Guerra-Gomes S, Alves ND, Ferreira F, Loureiro-Campos E, Branco  
692 MR, Sousa N, Reik W, Pinto L, Marques CJ. 2020. Tet3 ablation in adult brain neurons  
693 increases anxiety-like behavior and regulates cognitive function in mice. *Mol Psychiatry*.  
694 doi:10.1038/s41380-020-0695-7
- 695 Bertrand N, Castro DS, Guillemot F. 2002. Proneural genes and the specification of neural cell  
696 types. *Nat Rev Neurosci* **3**:517–530. doi:10.1038/nrn874
- 697 Bessa JM, Ferreira D, Melo I, Marques F, Cerqueira JJ, Palha JA, Almeida OFX, Sousa N. 2009.  
698 The mood-improving actions of antidepressants do not depend on neurogenesis but are  
699 associated with neuronal remodeling. *Mol Psychiatry* **14**:764–773.  
700 doi:10.1038/mp.2008.119
- 701 Boldrini M, Fulmore CA, Tartt AN, Simeon LR, Pavlova I, Poposka V, Rosoklija GB, Stankov A,  
702 Arango V, Dwork AJ, Hen R, Mann JJ. 2018. Human Hippocampal Neurogenesis Persists  
703 throughout Aging. *Cell Stem Cell* **22**:589–599.e5. doi:10.1016/j.stem.2018.03.015
- 704 Brill MS, Ninkovic J, Winpenny E, Hodge RD, Ozen I, Yang R, Lepier A, Gascón S, Erdelyi F,  
705 Szabo G, Parras C, Guillemot F, Frotscher M, Berninger B, Hevner RF, Raineteau O, Götz  
706 M. 2009. Adult generation of glutamatergic olfactory bulb interneurons. *Nat Neurosci*  
707 **12**:1524–1533. doi:10.1038/nn.2416
- 708 Carreno FR, Donegan JJ, Boley AM, Shah A, DeGuzman M, Frazer A, Lodge DJ. 2016.  
709 Activation of a ventral hippocampus–medial prefrontal cortex pathway is both necessary  
710 and sufficient for an antidepressant response to ketamine. *Mol Psychiatry* **21**:1298–1308.  
711 doi:10.1038/mp.2015.176
- 712 Castelhana-Carlos MJ, Sousa N, Ohi F, Baumans V. 2010. Identification methods in newborn  
713 C57BL/6 mice: a developmental and behavioural evaluation. *Lab Anim* **44**:88–103.  
714 doi:10.1258/la.2009.009044
- 715 Cerqueira JJ, Mailliet F, Almeida OFX, Jay TM, Sousa N. 2007. The Prefrontal Cortex as a Key  
716 Target of the Maladaptive Response to Stress. *J Neurosci* **27**:2781–2787.  
717 doi:10.1523/JNEUROSCI.4372-06.2007

- 718 Christian KM, Song H, Ming G. 2014. Functions and Dysfunctions of Adult Hippocampal  
719 Neurogenesis. *Annu Rev Neurosci* **37**:243–262. doi:10.1146/annurev-neuro-071013-  
720 014134
- 721 Colgin LL. 2011. Oscillations and hippocampal–prefrontal synchrony. *Curr Opin Neurobiol*  
722 **21**:467–474. doi:10.1016/j.conb.2011.04.006
- 723 Dennis C V., Suh LS, Rodriguez ML, Kril JJ, Sutherland GT. 2016. Human adult neurogenesis  
724 across the ages: An immunohistochemical study. *Neuropathol Appl Neurobiol* **42**:621–  
725 638. doi:10.1111/nan.12337
- 726 Eckert D, Buhl S, Weber S, Jäger R, Schorle H. 2005. The AP-2 family of transcription factors.  
727 *Genome Biol.* doi:10.1186/gb-2005-6-13-246
- 728 Englund C. 2005. Pax6, Tbr2, and Tbr1 Are Expressed Sequentially by Radial Glia, Intermediate  
729 Progenitor Cells, and Postmitotic Neurons in Developing Neocortex. *J Neurosci* **25**:247–  
730 251. doi:10.1523/JNEUROSCI.2899-04.2005
- 731 Fang J, Demic S, Cheng S. 2018. The reduction of adult neurogenesis in depression impairs the  
732 retrieval of new as well as remote episodic memory. *PLoS One* **13**:e0198406.  
733 doi:10.1371/journal.pone.0198406
- 734 Fell J, Axmacher N. 2011. The role of phase synchronization in memory processes. *Nat Rev*  
735 *Neurosci* **12**:105–118. doi:10.1038/nrn2979
- 736 Galichet C, Guillemot F, Parras CM. 2008. Neurogenin 2 has an essential role in development  
737 of the dentate gyrus. *Development* **135**:2031–2041. doi:10.1242/dev.015115
- 738 Garthe A, Behr J, Kempermann G. 2009. Adult-Generated Hippocampal Neurons Allow the  
739 Flexible Use of Spatially Precise Learning Strategies. *PLoS One* **4**:e5464.  
740 doi:10.1371/journal.pone.0005464
- 741 Garthe A, Kempermann G. 2013. An old test for new neurons: refining the Morris water maze to  
742 study the functional relevance of adult hippocampal neurogenesis. *Front Neurosci* **7**.  
743 doi:10.3389/fnins.2013.00063
- 744 Geneviève D, Sanlaville D, Faivre L, Kottler M-L, Jambou M, Gosset P, Boustani-Samara D,  
745 Pinto G, Ozilou C, Abeguilé G, Munnich A, Romana S, Raoul O, Cormier-Daire V,  
746 Vekemans M. 2005. Paternal deletion of the GNAS imprinted locus (including Gnasxl) in  
747 two girls presenting with severe pre- and post-natal growth retardation and intractable  
748 feeding difficulties. *Eur J Hum Genet* **13**:1033–1039. doi:10.1038/sj.ejhg.5201448
- 749 Gonçalves JT, Schafer ST, Gage FH. 2016. Adult Neurogenesis in the Hippocampus: From Stem  
750 Cells to Behavior. *Cell* **167**:897–914. doi:10.1016/j.cell.2016.10.021
- 751 Götz M, Stoykova A, Gruss P. 1998. Pax6 Controls Radial Glia Differentiation in the Cerebral  
752 Cortex. *Neuron* **21**:1031–1044. doi:10.1016/S0896-6273(00)80621-2
- 753 Gu Y, Arruda-Carvalho M, Wang J, Janoschka SR, Josselyn SA, Frankland PW, Ge S. 2012.  
754 Optical controlling reveals time-dependent roles for adult-born dentate granule cells. *Nat*

- 755 *Neurosci.* doi:10.1038/nn.3260
- 756 Guerra-Gomes S, Cunha-Garcia D, Marques Nascimento DS, Duarte-Silva S, Loureiro-Campos  
757 E, Morais Sardinha V, Viana JF, Sousa N, Maciel P, Pinto L, Oliveira JF. 2020. IP3R2 null  
758 mice display a normal acquisition of somatic and neurological development milestones.  
759 *Eur J Neurosci.* doi:10.1111/ejn.14724
- 760 Hack MA, Saghatelian A, de Chevigny A, Pfeifer A, Ashery-Padan R, Lledo P-M, Götz M. 2005.  
761 Neuronal fate determinants of adult olfactory bulb neurogenesis. *Nat Neurosci* **8**:865–872.  
762 doi:10.1038/nn1479
- 763 Hamilton DA, Brigman JL. 2015. Behavioral flexibility in rats and mice: Contributions of distinct  
764 frontocortical regions. *Genes, Brain Behav.* doi:10.1111/gbb.12191
- 765 Hevner RF. 2019. Intermediate progenitors and Tbr2 in cortical development. *J Anat* **235**:616–  
766 625. doi:10.1111/joa.12939
- 767 Hevner RF, Hodge RD, Daza RAM, Englund C. 2006. Transcription factors in glutamatergic  
768 neurogenesis: Conserved programs in neocortex, cerebellum, and adult hippocampus.  
769 *Neurosci Res* **55**:223–233. doi:10.1016/j.neures.2006.03.004
- 770 Heyser CJ. 2003. Assessment of Developmental Milestones in Rodents. *Curr Protoc Neurosci*  
771 **25**. doi:10.1002/0471142301.ns0818s25
- 772 Hilger-Eversheim K, Moser M, Schorle H, Buettner R. 2000. Regulatory roles of AP-2  
773 transcription factors in vertebrate development, apoptosis and cell-cycle control. *Gene*  
774 **260**:1–12. doi:10.1016/S0378-1119(00)00454-6
- 775 Hill AS, Sahay A, Hen R. 2015. Increasing Adult Hippocampal Neurogenesis is Sufficient to  
776 Reduce Anxiety and Depression-Like Behaviors. *Neuropsychopharmacology* **40**:2368–  
777 2378. doi:10.1038/npp.2015.85
- 778 Hill JM, Lim MA, Stone MM. 2008. Developmental Milestones in the Newborn Mouse. pp. 131–  
779 149. doi:10.1007/978-1-60327-099-1\_10
- 780 Hochgerner H, Zeisel A, Lönnerberg P, Linnarsson S. 2018. Conserved properties of dentate  
781 gyrus neurogenesis across postnatal development revealed by single-cell RNA  
782 sequencing. *Nat Neurosci* **21**:290–299. doi:10.1038/s41593-017-0056-2
- 783 Hodge RD, Nelson BR, Kahoud RJ, Yang R, Mussar KE, Reiner SL, Hevner RF. 2012. Tbr2 Is  
784 Essential for Hippocampal Lineage Progression from Neural Stem Cells to Intermediate  
785 Progenitors and Neurons. *J Neurosci* **32**:6275–6287. doi:10.1523/JNEUROSCI.0532-  
786 12.2012
- 787 Høei-Hansen CE, Nielsen JE, Almstrup K, Sonne SB, Graem N, Skakkebaek NE, Leffers H,  
788 Rajpert-De Meyts E. 2004. Transcription factor AP-2γ is a developmentally regulated  
789 marker of testicular carcinoma in situ and germ cell tumors. *Clin Cancer Res* **10**:8521–  
790 8530. doi:10.1158/1078-0432.CCR-04-1285
- 791 Hsieh J. 2012. Orchestrating transcriptional control of adult neurogenesis. *Genes Dev* **26**:1010–

- 792 1021. doi:10.1101/gad.187336.112
- 793 Jessberger S, Clark RE, Broadbent NJ, Clemenson GD, Consiglio A, Lie DC, Squire LR, Gage  
794 FH. 2009. Dentate gyrus-specific knockdown of adult neurogenesis impairs spatial and  
795 object recognition memory in adult rats. *Learn Mem* **16**:147–154. doi:10.1101/lm.1172609
- 796 Kase Y, Kase Y, Shimazaki T, Okano H. 2020. Current understanding of adult neurogenesis in  
797 the mammalian brain: How does adult neurogenesis decrease with age? *Inflamm Regen*.  
798 doi:10.1186/s41232-020-00122-x
- 799 Katsimpardi L, Lledo PM. 2018. Regulation of neurogenesis in the adult and aging brain. *Curr*  
800 *Opin Neurobiol*. doi:10.1016/j.conb.2018.07.006
- 801 Kempermann G, Gage FH, Aigner L, Song H, Curtis MA, Thuret S, Kuhn HG, Jessberger S,  
802 Frankland PW, Cameron HA, Gould E, Hen R, Abrous DN, Toni N, Schinder AF, Zhao X,  
803 Lucassen PJ, Frisén J. 2018. Human Adult Neurogenesis: Evidence and Remaining  
804 Questions. *Cell Stem Cell* **23**:25–30. doi:10.1016/j.stem.2018.04.004
- 805 Kempermann G, Jessberger S, Steiner B, Kronenberg G. 2004. Milestones of neuronal  
806 development in the adult hippocampus. *Trends Neurosci* **27**:447–452.  
807 doi:10.1016/j.tins.2004.05.013
- 808 Kokras N, Baltas D, Theocharis F, Dalla C. 2017. Kinoscope: An Open-Source Computer  
809 Program for Behavioral Pharmacologists. *Front Behav Neurosci* **11**:1–7.  
810 doi:10.3389/fnbeh.2017.00088
- 811 Leger M, Quiedeville A, Bouet V, Haelewyn B, Boulouard M, Schumann-Bard P, Freret T. 2013.  
812 Object recognition test in mice. *Nat Protoc*. doi:10.1038/nprot.2013.155
- 813 Li M, Wang Y, Yu Y, Nishizawa M, Nakajima T, Ito S, Kannan P. 2002. The human transcription  
814 factor activation protein-2 gamma (AP-2γ): gene structure, promoter, and expression in  
815 mammary carcinoma cell lines. *Gene* **301**:43–51. doi:10.1016/S0378-1119(02)01057-0
- 816 Lim JH, Booker AB, Luo T, Williams T, Furuta Y, Lagutin O, Oliver G, Sargent TD, Fallon JR.  
817 2005. AP-2α selectively regulates fragile X mental retardation-1 gene transcription during  
818 embryonic development. *Hum Mol Genet* **14**:2027–2034. doi:10.1093/hmg/ddi207
- 819 Mateus-Pinheiro A, Alves ND, Patrício P, Machado-Santos AR, Loureiro-Campos E, Silva JM,  
820 Sardinha VM, Reis J, Schorle H, Oliveira JF, Ninkovic J, Sousa N, Pinto L. 2017. AP2γ  
821 controls adult hippocampal neurogenesis and modulates cognitive, but not anxiety or  
822 depressive-like behavior. *Mol Psychiatry* **22**:1725–1734. doi:10.1038/mp.2016.169
- 823 Mateus-Pinheiro A, Alves ND, Sousa N, Pinto L. 2018. AP2γ: A New Player on Adult  
824 Hippocampal Neurogenesis Regulation. *J Exp Neurosci* **12**:1–4.  
825 doi:10.1177/1179069518766897
- 826 Mateus-Pinheiro A, Patrício P, Bessa JM, Sousa N, Pinto L. 2013a. Cell genesis and dendritic  
827 plasticity: a neuroplastic pas de deux in the onset and remission from depression. *Mol*  
828 *Psychiatry* **18**:748–750. doi:10.1038/mp.2013.56

- 829 Mateus-Pinheiro A, Pinto L, Bessa JM, Morais M, Alves ND, Monteiro S, Patrício P, Almeida  
830 OFX, Sousa N. 2013b. Sustained remission from depressive-like behavior depends on  
831 hippocampal neurogenesis. *Transl Psychiatry* **3**:e210–e210. doi:10.1038/tp.2012.141
- 832 Mitra PP, Pesaran B. 1999. Analysis of Dynamic Brain Imaging Data. *Biophys J* **76**:691–708.  
833 doi:10.1016/S0006-3495(99)77236-X
- 834 Moreno-Jiménez EP, Flor-García M, Terreros-Roncal J, Rábano A, Cafini F, Pallas-Bazarra N,  
835 Ávila J, Llorens-Martín M. 2019. Adult hippocampal neurogenesis is abundant in  
836 neurologically healthy subjects and drops sharply in patients with Alzheimer’s disease.  
837 *Nat Med* **25**:554–560. doi:10.1038/s41591-019-0375-9
- 838 Morris R. 1984. Developments of a water-maze procedure for studying spatial learning in the rat.  
839 *J Neurosci Methods* **11**:47–60. doi:10.1016/0165-0270(84)90007-4
- 840 Moser M, Pscherer A, Roth C, Becker J, Mucher G, Zerres K, Dixkens C, Weis J, Guay-Woodford  
841 L, Buettner R, Fassler R. 1997. Enhanced apoptotic cell death of renal epithelial cells in  
842 mice lacking transcription factor AP-2beta. *Genes Dev* **11**:1938–1948.  
843 doi:10.1101/gad.11.15.1938
- 844 Nacher J, Varea E, Blasco-Ibañez JM, Castillo-Gomez E, Crespo C, Martinez-Guijarro FJ,  
845 McEwen BS. 2005. Expression of the transcription factor Pax6 in the adult rat dentate  
846 gyrus. *J Neurosci Res* **81**:753–761. doi:10.1002/jnr.20596
- 847 Ødegaard E, Staff AC, Kærn J, Flørenes VA, Kopolovic J, Tropé CG, Abeler VM, Reich R,  
848 Davidson B. 2006. The AP-2 $\gamma$  transcription factor is upregulated in advanced-stage  
849 ovarian carcinoma. *Gynecol Oncol* **100**:462–468. doi:10.1016/j.ygyno.2005.09.022
- 850 Oliveira JF, Dias NS, Correia M, Gama-Pereira F, Sardinha VM, Lima A, Oliveira AF, Jacinto LR,  
851 Ferreira DS, Silva AM, Reis JS, Cerqueira JJ, Sousa N. 2013. Chronic stress disrupts  
852 neural coherence between cortico-limbic structures. *Front Neural Circuits* **7**.  
853 doi:10.3389/fncir.2013.00010
- 854 Pinto L, Drechsel D, Schmid M-T, Ninkovic J, Irmeler M, Brill MS, Restani L, Gianfranceschi L,  
855 Cerri C, Weber SN, Tarabykin V, Baer K, Guillemot F, Beckers J, Zecevic N, Dehay C,  
856 Caleo M, Schorle H, Götz M. 2009. AP2 $\gamma$  regulates basal progenitor fate in a region- and  
857 layer-specific manner in the developing cortex. *Nat Neurosci* **12**:1229–1237.  
858 doi:10.1038/nn.2399
- 859 Porsolt RD, Bertin A, Jalfre M. 1977. Behavioral despair in mice: a primary screening test for  
860 antidepressants. *Arch Int Pharmacodyn Ther* **229**:327–36.
- 861 Revest J-M, Dupret D, Koehl M, Funk-Reiter C, Grosjean N, Piazza P-V, Abrous DN. 2009. Adult  
862 hippocampal neurogenesis is involved in anxiety-related behaviors. *Mol Psychiatry*  
863 **14**:959–967. doi:10.1038/mp.2009.15
- 864 Roybon L, Hjalt T, Stott S, Guillemot F, Li J-Y, Brundin P. 2009. Neurogenin2 Directs Granule  
865 Neuroblast Production and Amplification while NeuroD1 Specifies Neuronal Fate during



- 866 Hippocampal Neurogenesis. *PLoS One* **4**:e4779. doi:10.1371/journal.pone.0004779
- 867 Ruediger S, Spirig D, Donato F, Caroni P. 2012. Goal-oriented searching mediated by ventral  
868 hippocampus early in trial-and-error learning. *Nat Neurosci* **15**:1563–1571.  
869 doi:10.1038/nn.3224
- 870 Sahay A, Hen R. 2007. Adult hippocampal neurogenesis in depression. *Nat Neurosci* **10**:1110–  
871 1115. doi:10.1038/nn1969
- 872 Santos M, Silva-Fernandes A, Oliveira P, Sousa N, Maciel P. 2007. Evidence for abnormal early  
873 development in a mouse model of Rett syndrome. *Genes, Brain Behav* **6**:277–286.  
874 doi:10.1111/j.1601-183X.2006.00258.x
- 875 Sardinha VM, Guerra-Gomes S, Caetano I, Tavares G, Martins M, Reis JS, Correia JS, Teixeira-  
876 Castro A, Pinto L, Sousa N, Oliveira JF. 2017. Astrocytic signaling supports hippocampal-  
877 prefrontal theta synchronization and cognitive function. *Glia* **65**:1944–1960.  
878 doi:10.1002/glia.23205
- 879 Schorle H, Meier P, Buchert M, Jaenisch R, Mitchell PJ. 1996. Transcription factor AP-2 essential  
880 for cranial closure and craniofacial development. *Nature* **381**:235–238.  
881 doi:10.1038/381235a0
- 882 Thewes V, Orso F, Jäger R, Eckert D, Schäfer S, Kirfel G, Garbe S, Taverna D, Schorle H. 2010.  
883 Interference with Activator Protein-2 transcription factors leads to induction of apoptosis  
884 and an increase in chemo- and radiation-sensitivity in breast cancer cells. *BMC Cancer*  
885 **10**:192. doi:10.1186/1471-2407-10-192
- 886 Tobin MK, Musaraca K, Disouky A, Shetti A, Bheri A, Honer WG, Kim N, Dawe RJ, Bennett DA,  
887 Arfanakis K, Lazarov O. 2019. Human Hippocampal Neurogenesis Persists in Aged Adults  
888 and Alzheimer's Disease Patients. *Cell Stem Cell* **24**:974-982.e3.  
889 doi:10.1016/j.stem.2019.05.003
- 890 Toda T, Parylak SL, Linker SB, Gage FH. 2019. The role of adult hippocampal neurogenesis in  
891 brain health and disease. *Mol Psychiatry* **24**:67–87. doi:10.1038/s41380-018-0036-2
- 892 Tsai Cheng Yu, Tsai Ching Yen, Arnold SJ, Huang GJ. 2015. Ablation of hippocampal  
893 neurogenesis in mice impairs the response to stress during the dark cycle. *Nat Commun*  
894 **6**:1–7. doi:10.1038/ncomms9373
- 895 Veerasammy S, Van Steenwinckel J, Le Charpentier T, Seo JH, Fleiss B, Gressens P, Levison  
896 SW. 2020. Perinatal IL-1 $\beta$ -induced inflammation suppresses Tbr2+ intermediate  
897 progenitor cell proliferation in the developing hippocampus accompanied by long-term  
898 behavioral deficits. *Brain, Behav Immun - Heal* **7**:100106. doi:10.1016/j.bbih.2020.100106
- 899 Waclaw RR, Allen ZJ, Bell SM, Erdélyi F, Szabó G, Potter SS, Campbell K. 2006. The Zinc  
900 Finger Transcription Factor Sp8 Regulates the Generation and Diversity of Olfactory Bulb  
901 Interneurons. *Neuron* **49**:503–516. doi:10.1016/j.neuron.2006.01.018
- 902 Walf AA, Frye CA. 2007. The use of the elevated plus maze as an assay of anxiety-related

903 behavior in rodents. *Nat Protoc* **2**:322–328. doi:10.1038/nprot.2007.44  
904 Yalcin I, Belzung C, Surget A. 2008. Mouse strain differences in the unpredictable chronic mild  
905 stress: a four-antidepressant survey. *Behav Brain Res* **193**:140–143.  
906 doi:10.1016/j.bbr.2008.04.021  
907  
908



909 **Table:**

910 **Table 1:** Results from the milestones protocol tests included in the assessment of early postnatal  
 911 neurodevelopment. Sample size:  $n_{WT} = 9$ ;  $n_{AP2\gamma^{+/-}} = 9$ . Abbreviations: WT, wild-type;  $AP2\gamma^{+/-}$ ,  $AP2\gamma$   
 912 heterozygous mice; PND: Postnatal day  
 913

| Milestone test                          | WT<br>Day (median) | $AP2\gamma^{+/-}$<br>Day (median) | Statistical test,<br>significance<br>Mann-Whitney test | typical range  |
|-----------------------------------------|--------------------|-----------------------------------|--------------------------------------------------------|----------------|
| <b>Rooting</b> (S. Figure 2B)           | 7                  | 7                                 | $U = 31.50, p = 0.43$                                  | PND 1 – PND 15 |
| <b>Ear twitch</b> (S. Figure 2C)        | 8                  | 9                                 | $U = 20.50, p = 0.23$                                  | PND 6 – PND 14 |
| <b>Auditory startle</b> (S. Figure 2D)  | 7.5                | 7                                 | $U = 29, p = 0.90$                                     | PND 7 – PND 16 |
| <b>Open field</b> (S. Figure 2E)        | 8                  | 8                                 | $U = 27.5, p = 0.73$                                   | PND 6 – PND 15 |
| <b>Walking</b> (S. Figure 2F)           | 10                 | 9                                 | $U = 33, p = 0.78$                                     | PND 7 – PND 14 |
| <b>Surface righting</b> (S. Figure 2G)  | 6                  | 7                                 | $U = 37, p = 0.12$                                     | PND1 – PND10   |
| <b>Negative geotaxis</b> (S. Figure 2H) | 8                  | 9                                 | $U = 25, p = 0.17$                                     | PND 3 – PND 15 |
| <b>Cliff aversion</b> (S. Figure 2I)    | 7.5                | 6                                 | $U = 18; p = 0.26$                                     | PND 1 – PND 14 |
| <b>Postural reflex</b> (S. Figure 2J)   | 9.5                | 8                                 | $U = 23, p = 0.24$                                     | PND 5 – PND 21 |
| <b>Air righting</b> (S. Figure 2K)      | 12                 | 11                                | $U = 29, p = 0.32$                                     | PND7 – PND16   |
| <b>Wire suspension</b> (S. Figure 2L)   | 13                 | 11                                | $U = 21.5, p=0.10$                                     | PND 5 – PND 21 |
| <b>Grasping</b> (S. Figure 2M)          | 16.5               | 16                                | $U = 25.5, p=0.32$                                     | PND 13 - PND17 |
| <b>Eye-opening</b> (S. Figure 2P)       | 12                 | 11                                | $U = 7.5, p < 0.01$                                    | PND 7 - 17     |

  

|                                           | WT<br>Mean $\pm$ SEM | $AP2\gamma^{+/-}$<br>Mean $\pm$ SEM | Statistical test, significance<br>Repeated measures ANOVA |
|-------------------------------------------|----------------------|-------------------------------------|-----------------------------------------------------------|
| <b>Homing</b> (S. Figure 2N)              | <b>Trial 1</b>       | 6.89 s $\pm$ 0.44                   | $F_{(1,16)} = 0.06, p = 0.80$                             |
|                                           | <b>Trial 2</b>       | 6.33 s $\pm$ 1.12                   |                                                           |
|                                           | <b>Trial 3</b>       | 5.22 s $\pm$ 1.57                   |                                                           |
| <b>Weight gain pattern</b> (S. Figure 2O) | 8.99 g $\pm$ 0.53    | 9.22 g $\pm$ 0.16                   | $F_{(1,16)} = 0.32, p = 0.58$                             |

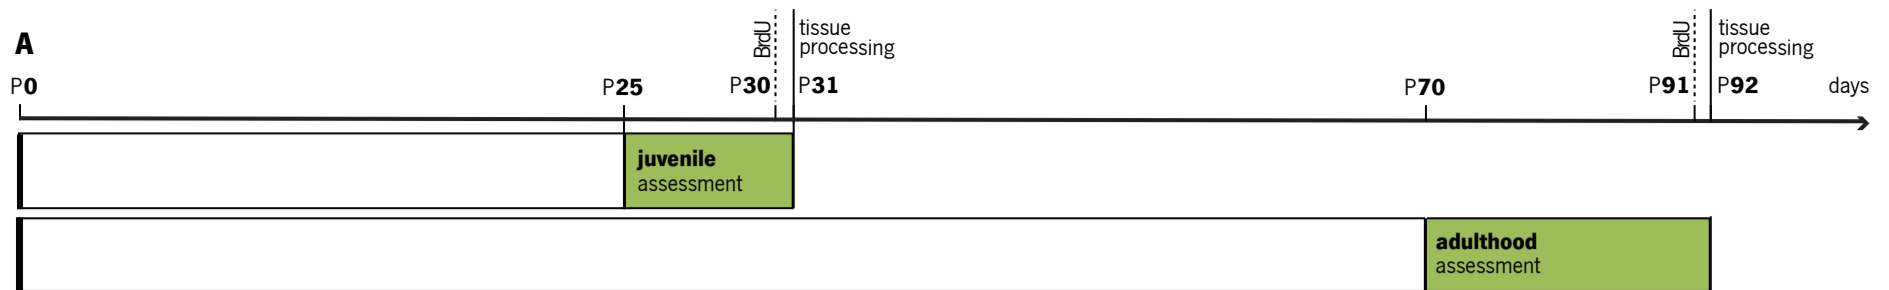

Transcriptional network orchestration

Juvenile hippocampal DG assessment

Adult hippocampal DG assessment

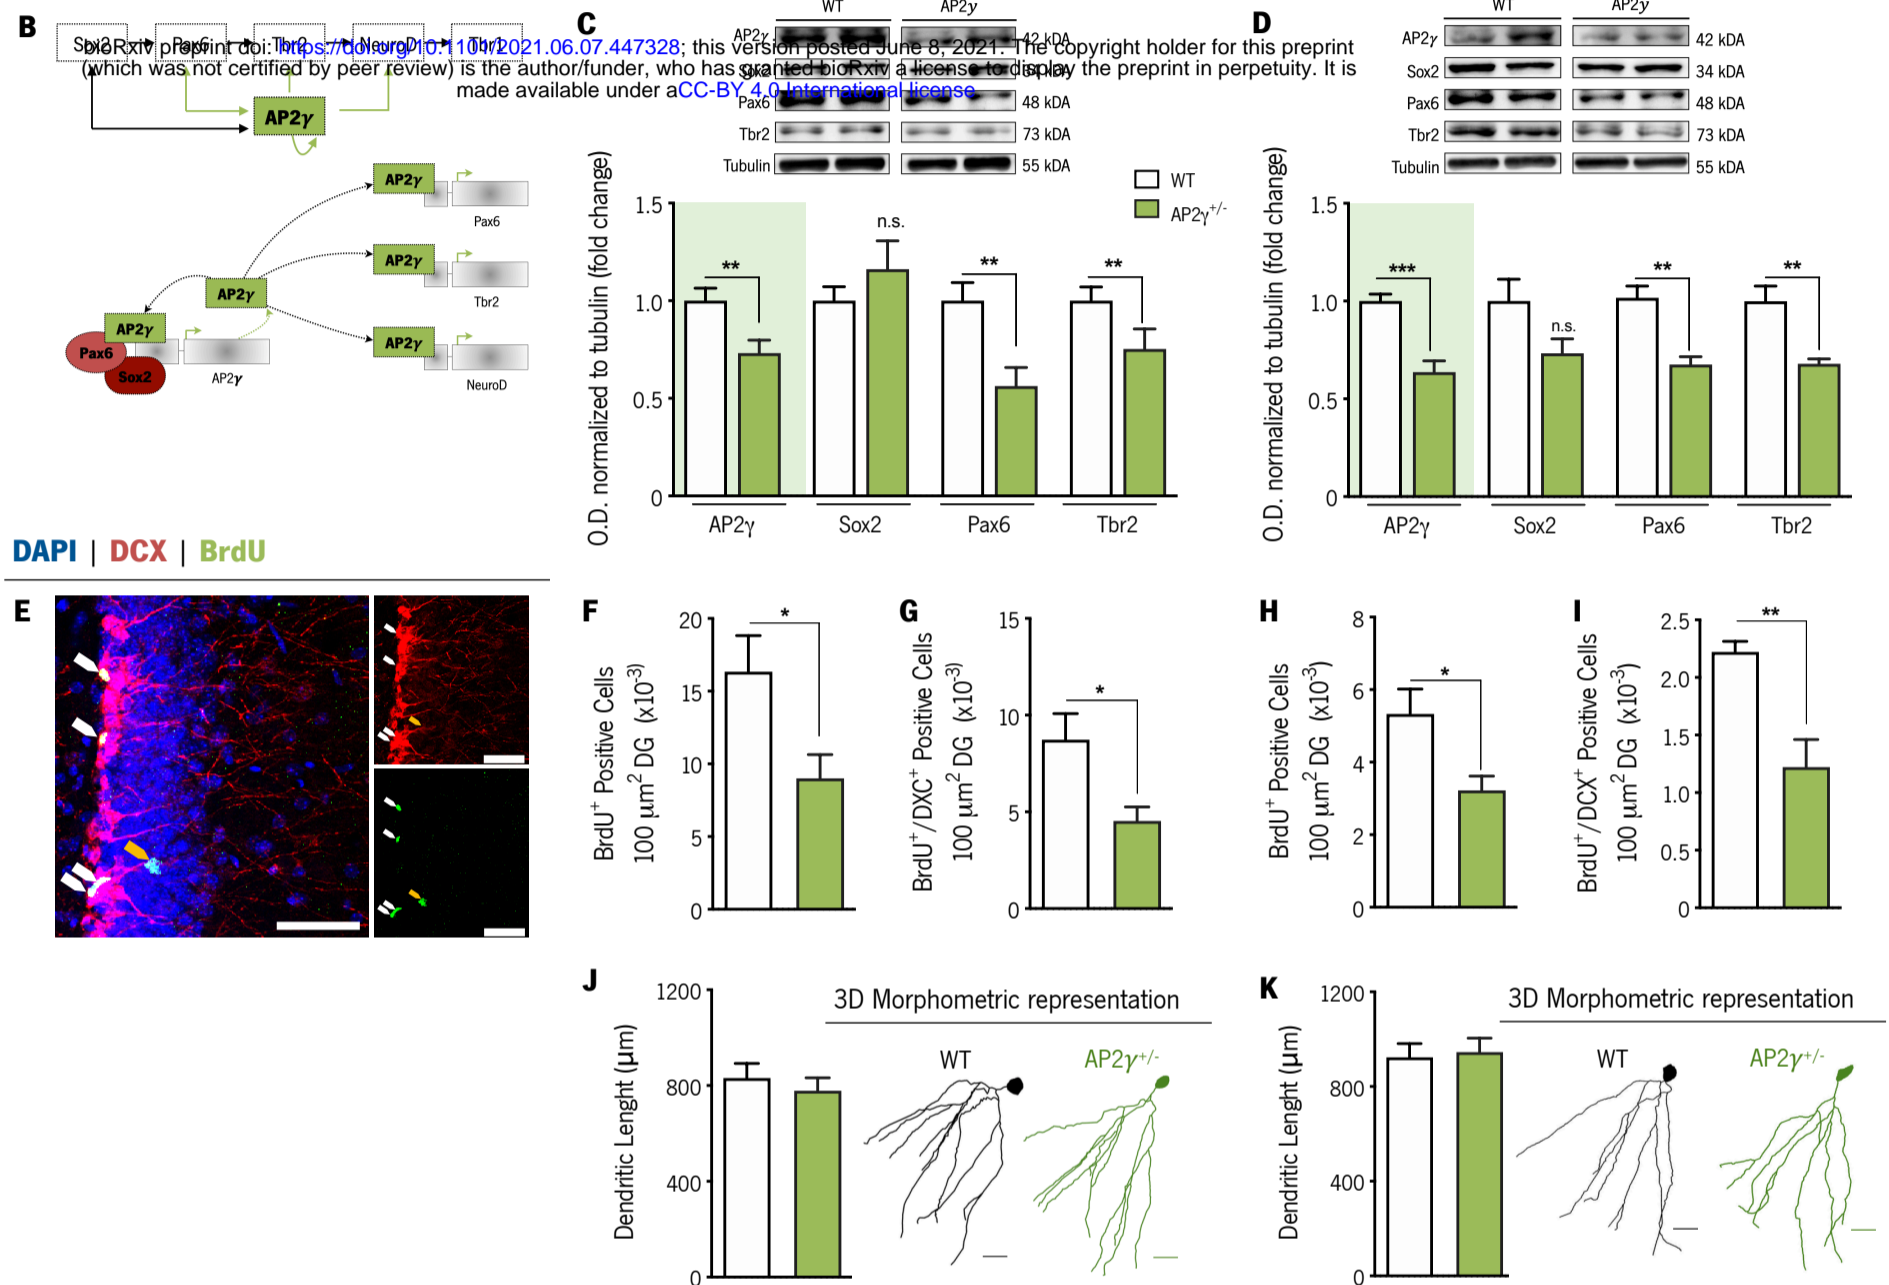

**Figure 1: Constitutive and heterozygous AP2 $\gamma$  deficiency reduces postnatal hippocampal neurogenesis both at juvenile and adult periods.**

(A) Experimental timeline. (B) Transcriptional network of hippocampal neurogenesis under modulatory role of AP2 $\gamma$ . Western-blot analysis of AP2 $\gamma$ , Sox2, Pax6, and Tbr2 in juvenile (C) and adult (D) dentate gyrus (DG) protein extracts. (E) Hippocampal DG coronal section immunostained for bromodeoxyuridine (BrdU) (green), doublecortin (DCX) (in red), and DAPI (in blue). BrdU/DCX double-positive cells are indicated by white arrows and solely BrdU-positive cell is identified with a yellow arrow. (F-I) Cell counts of BrdU-positive and BrdU/DCX double-positive cells in the hippocampal DG of juvenile and adult mice. (J and K) Dendritic length of three-dimensional (3D) neuronal reconstructed hippocampal granular neurons in juvenile (J) and adult (K) mice. Data presented as mean  $\pm$  SEM. Sample size: Western-blot analysis:  $n_{WT}$  juvenile = 4;  $n_{AP2\gamma^{-/-}}$  juvenile = 4;  $n_{WT}$  adult = 4;  $n_{AP2\gamma^{-/-}}$  adult = 4; Immunostainings assays:  $n_{WT}$  juvenile = 6;  $n_{AP2\gamma^{-/-}}$  juvenile = 6;  $n_{WT}$  adult = 5;  $n_{AP2\gamma^{-/-}}$  adult = 5; 3D neuronal reconstruction:  $n_{WT}$  juvenile = 4;  $n_{AP2\gamma^{-/-}}$  juvenile = 4;  $n_{WT}$  adult = 4;  $n_{AP2\gamma^{-/-}}$  adult = 5. [Student's t-test; \*\*\* $p$ <0.001, \*\* $p$ < 0.01; \* $p$ < 0.05; Statistical summary in Supplementary table 1]. Scale bars represent 50  $\mu$ m. Abbreviations: WT, wild-type; AP2 $\gamma^{-/-}$ , AP2 $\gamma$  heterozygous knockout mice; O.D., optical density.

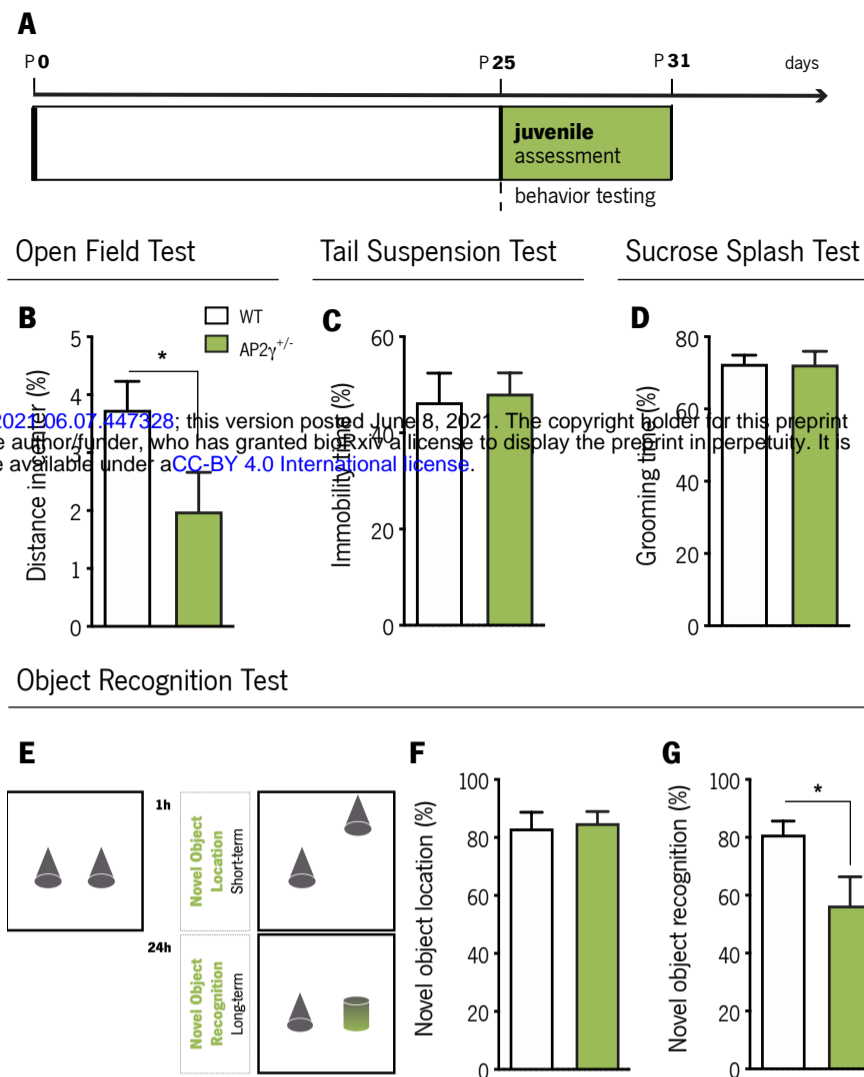

bioRxiv preprint doi: <https://doi.org/10.1101/2022.06.07.447328>; this version posted June 8, 2021. The copyright holder for this preprint (which was not certified by peer review) is the author/funder, who has granted bioRxiv a license to display the preprint in perpetuity. It is made available under aCC-BY 4.0 International license.

**Figure 2: AP2 $\gamma$  deficiency increased anxiety-like behavior and promotes cognitive deficits in juvenile mice.** (A) Timeline of behavioral assessment. Anxiety-like behavior was assessed through the open-field test (OF) (B), and depressive- and anhedonic-like behavior by the tail-suspension (TST) (C) and the sucrose splash (SST) (D) test. (E) To evaluate cognition, juvenile mice were subjected to the object recognition test, in particular to the novel object location (F) and the novel object recognition (G) tasks. Data presented as mean  $\pm$  SEM. Sample size: OF:  $n_{WT} = 13$ ;  $n_{AP2\gamma^{+/-}} = 11$ ; TST:  $n_{WT} = 16$ ;  $n_{AP2\gamma^{+/-}} = 13$ ; ST:  $n_{WT} = 15$ ;  $n_{AP2\gamma^{+/-}} = 10$ ; ORT:  $n_{WT} = 11$ ;  $n_{AP2\gamma^{+/-}} = 8$ . [Student's t-test; \*  $p < 0.05$ ; Statistical summary in Supplementary table 1]. Abbreviations: WT, wild-type; AP2 $\gamma^{+/-}$ , AP2 $\gamma$  heterozygous knockout mice.

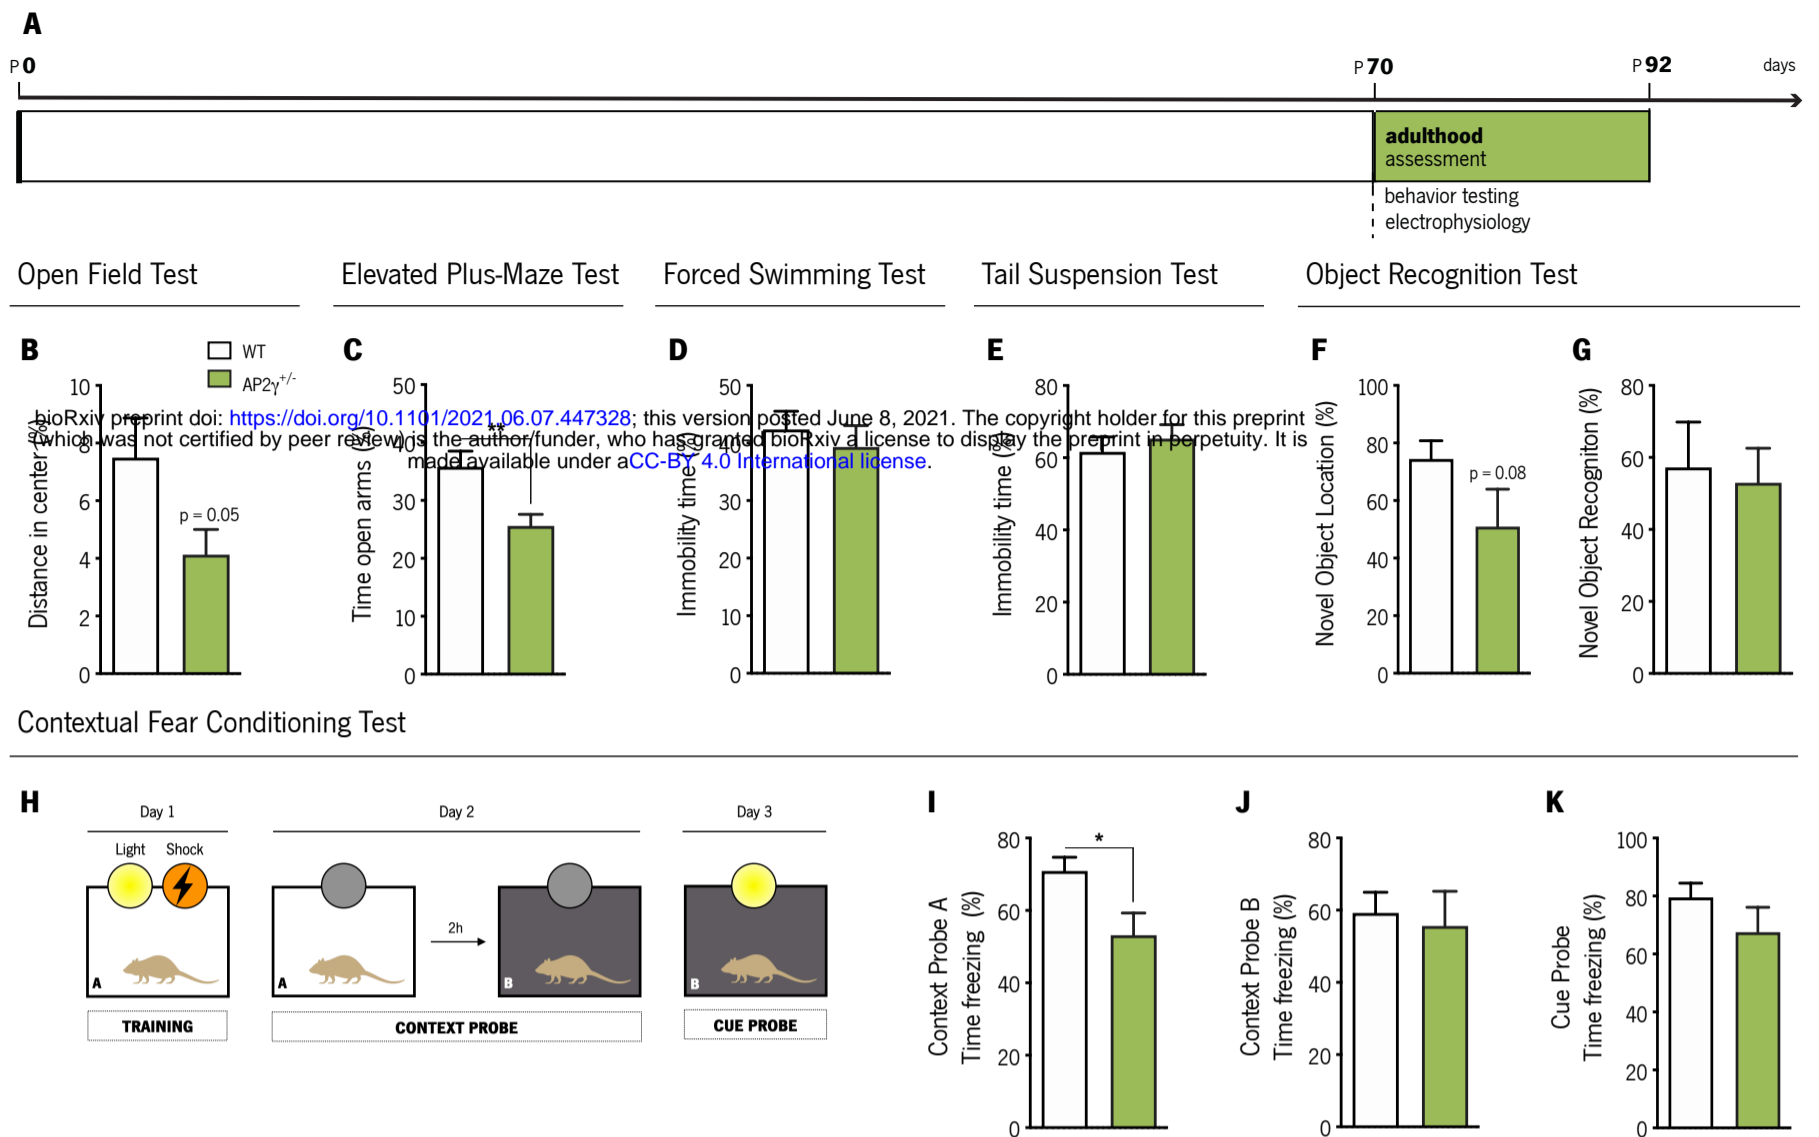

**Figure 3: Behavioral assessment of adult mice.** (A) Experimental timeline. (B and C) Anxiety-like behavior was assessed through the open-field test (OF) (B) and the elevated plus-maze (EPM) (C), while depressive-like behavior was evaluated through the forced-swimming test (FST) (D) and the tail-suspension (TST) (E) test. Object recognition test (ORT) (F and G) and (H-K) contextual fear conditioning (CFC) were performed to assess cognitive performance. Data presented as mean  $\pm$  SEM. Sample size: OF, EPM and FST:  $n_{WT} = 12$ ;  $n_{AP2\gamma^{+/-}} = 14$ ; TST:  $n_{WT} = 6$ ;  $n_{AP2\gamma^{+/-}} = 6$ ; ORT:  $n_{WT} = 12$ ;  $n_{AP2\gamma^{+/-}} = 9$ ; CFC:  $n_{WT} = 7$ ;  $n_{AP2\gamma^{+/-}} = 6$ . [Student's t-test; \*\*  $p < 0.01$ ; \*  $p < 0.05$ ; Statistical summary in Supplementary table 1]. Abbreviations: WT, wild-type; AP2 $\gamma^{+/-}$ , AP2 $\gamma$  heterozygous knockout mice.

# Water Maze Tasks

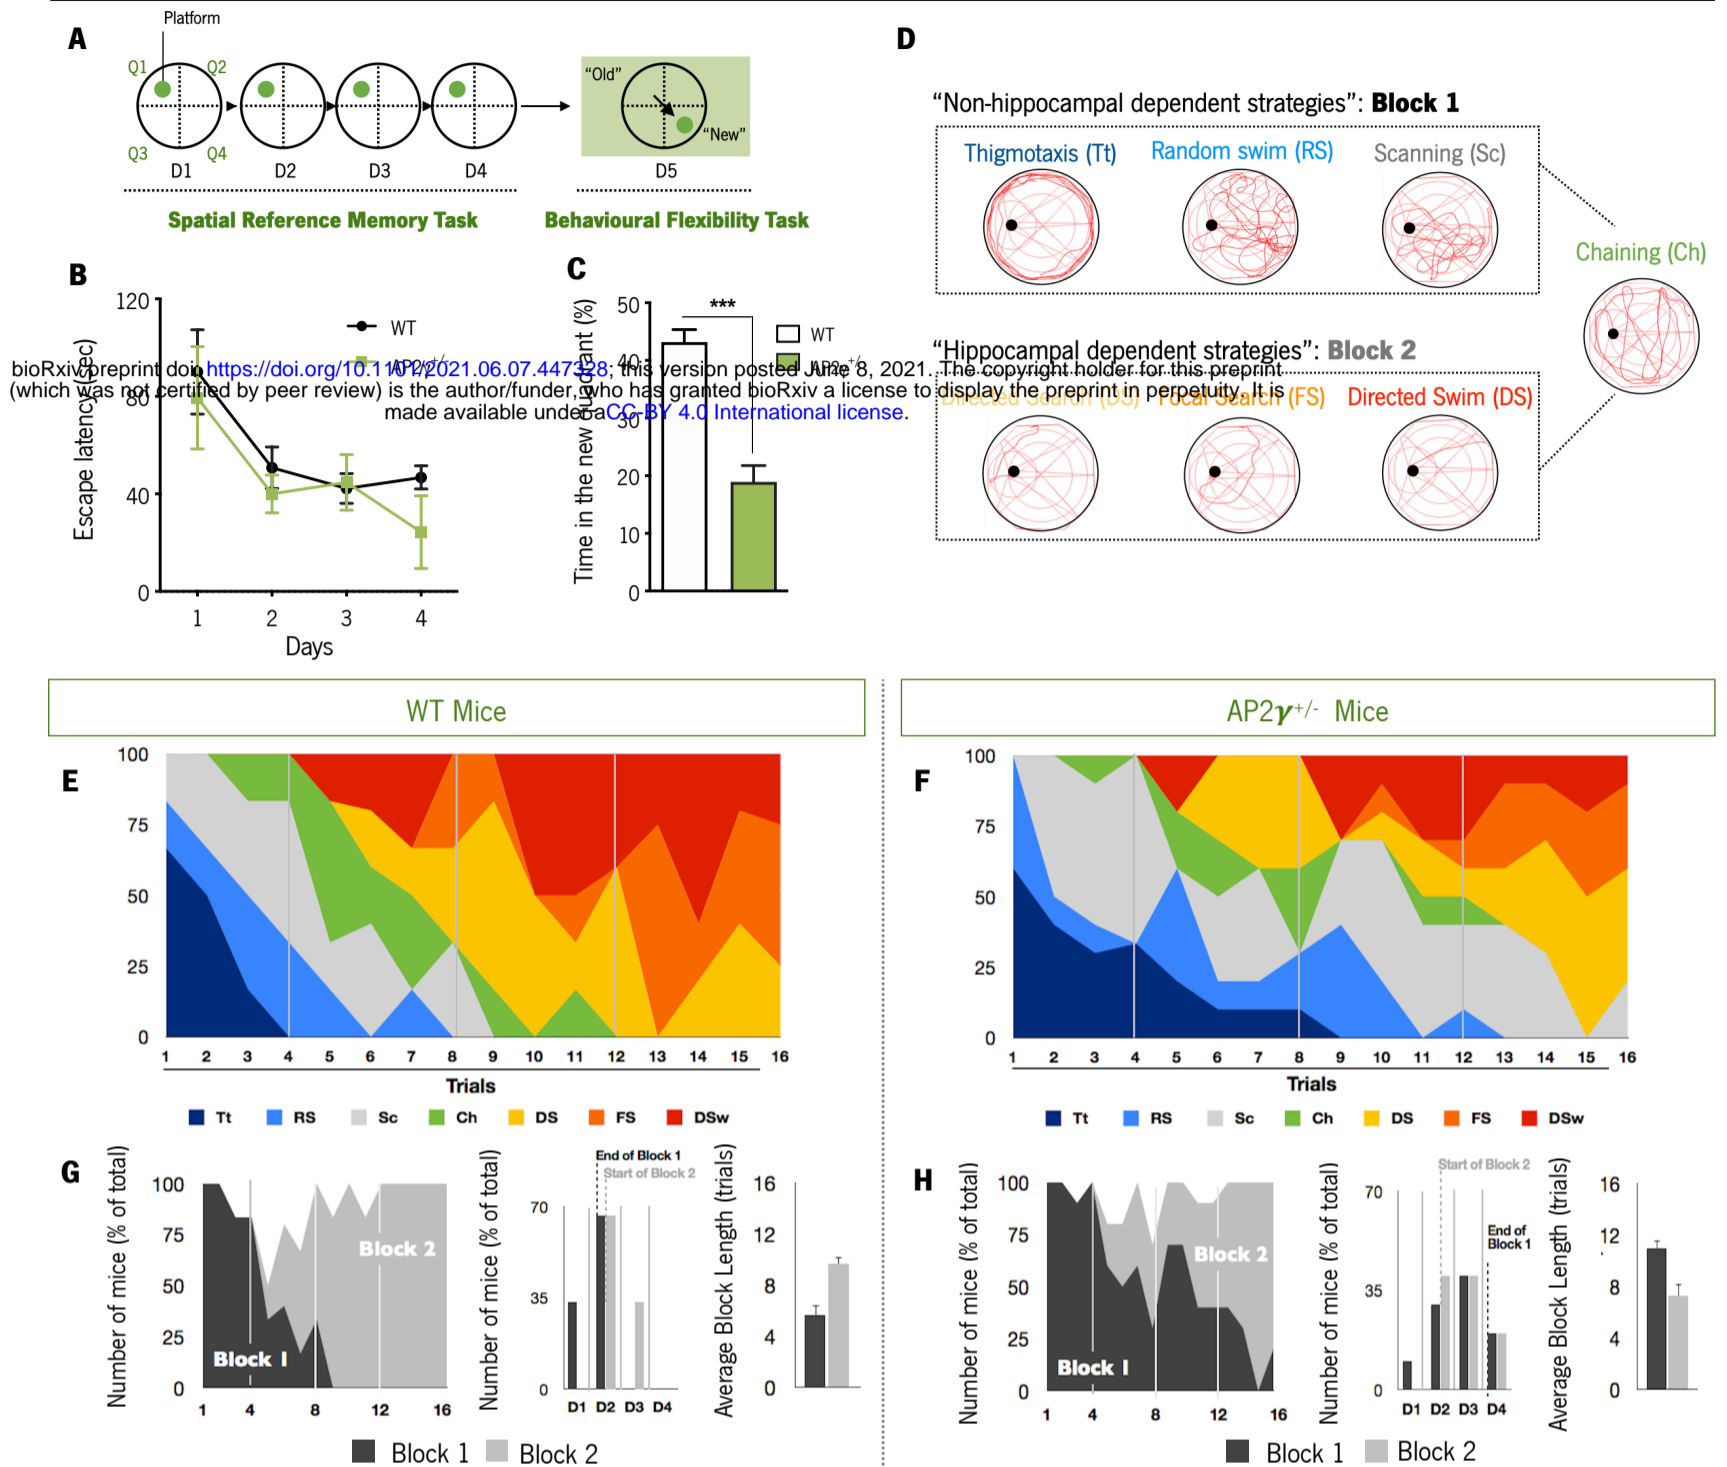

**Figure 4: Cognitive performance of adult mice in the Morris water maze test.** (A and B) Spatial reference memory was assessed as the average escape latency to find a hidden and fixed platform in each test day. (C) In the testing day, animals were subjected to a reversal-learning task to test behavioral flexibility. (D) Schematic representation of typical strategies to find the platform during spatial memory evaluation grouped according to its dependence of the hippocampus (Block 1: Non-hippocampal dependent strategies; Block 2: Hippocampal dependent strategies). Average of each strategy used for WT (E) and AP2 $\gamma^{+/-}$  (F) mice, by trial number. The prevalence of each block along with trials, the distribution of strategies-block boundaries, and overall block length are shown for (G) WT and (F) AP2 $\gamma^{+/-}$  mice. Data presented as mean SEM.  $n_{WT} = 10$ ;  $n_{AP2\gamma^{+/-}} = 10$ . [Repeated measures ANOVA and Student's t-test; \*\*\* $p < 0.001$ ; Statistical summary in Supplementary table 1]. Abbreviations: WT, wild-type; AP2 $\gamma^{+/-}$ , AP2 $\gamma$  heterozygous knockout mice.

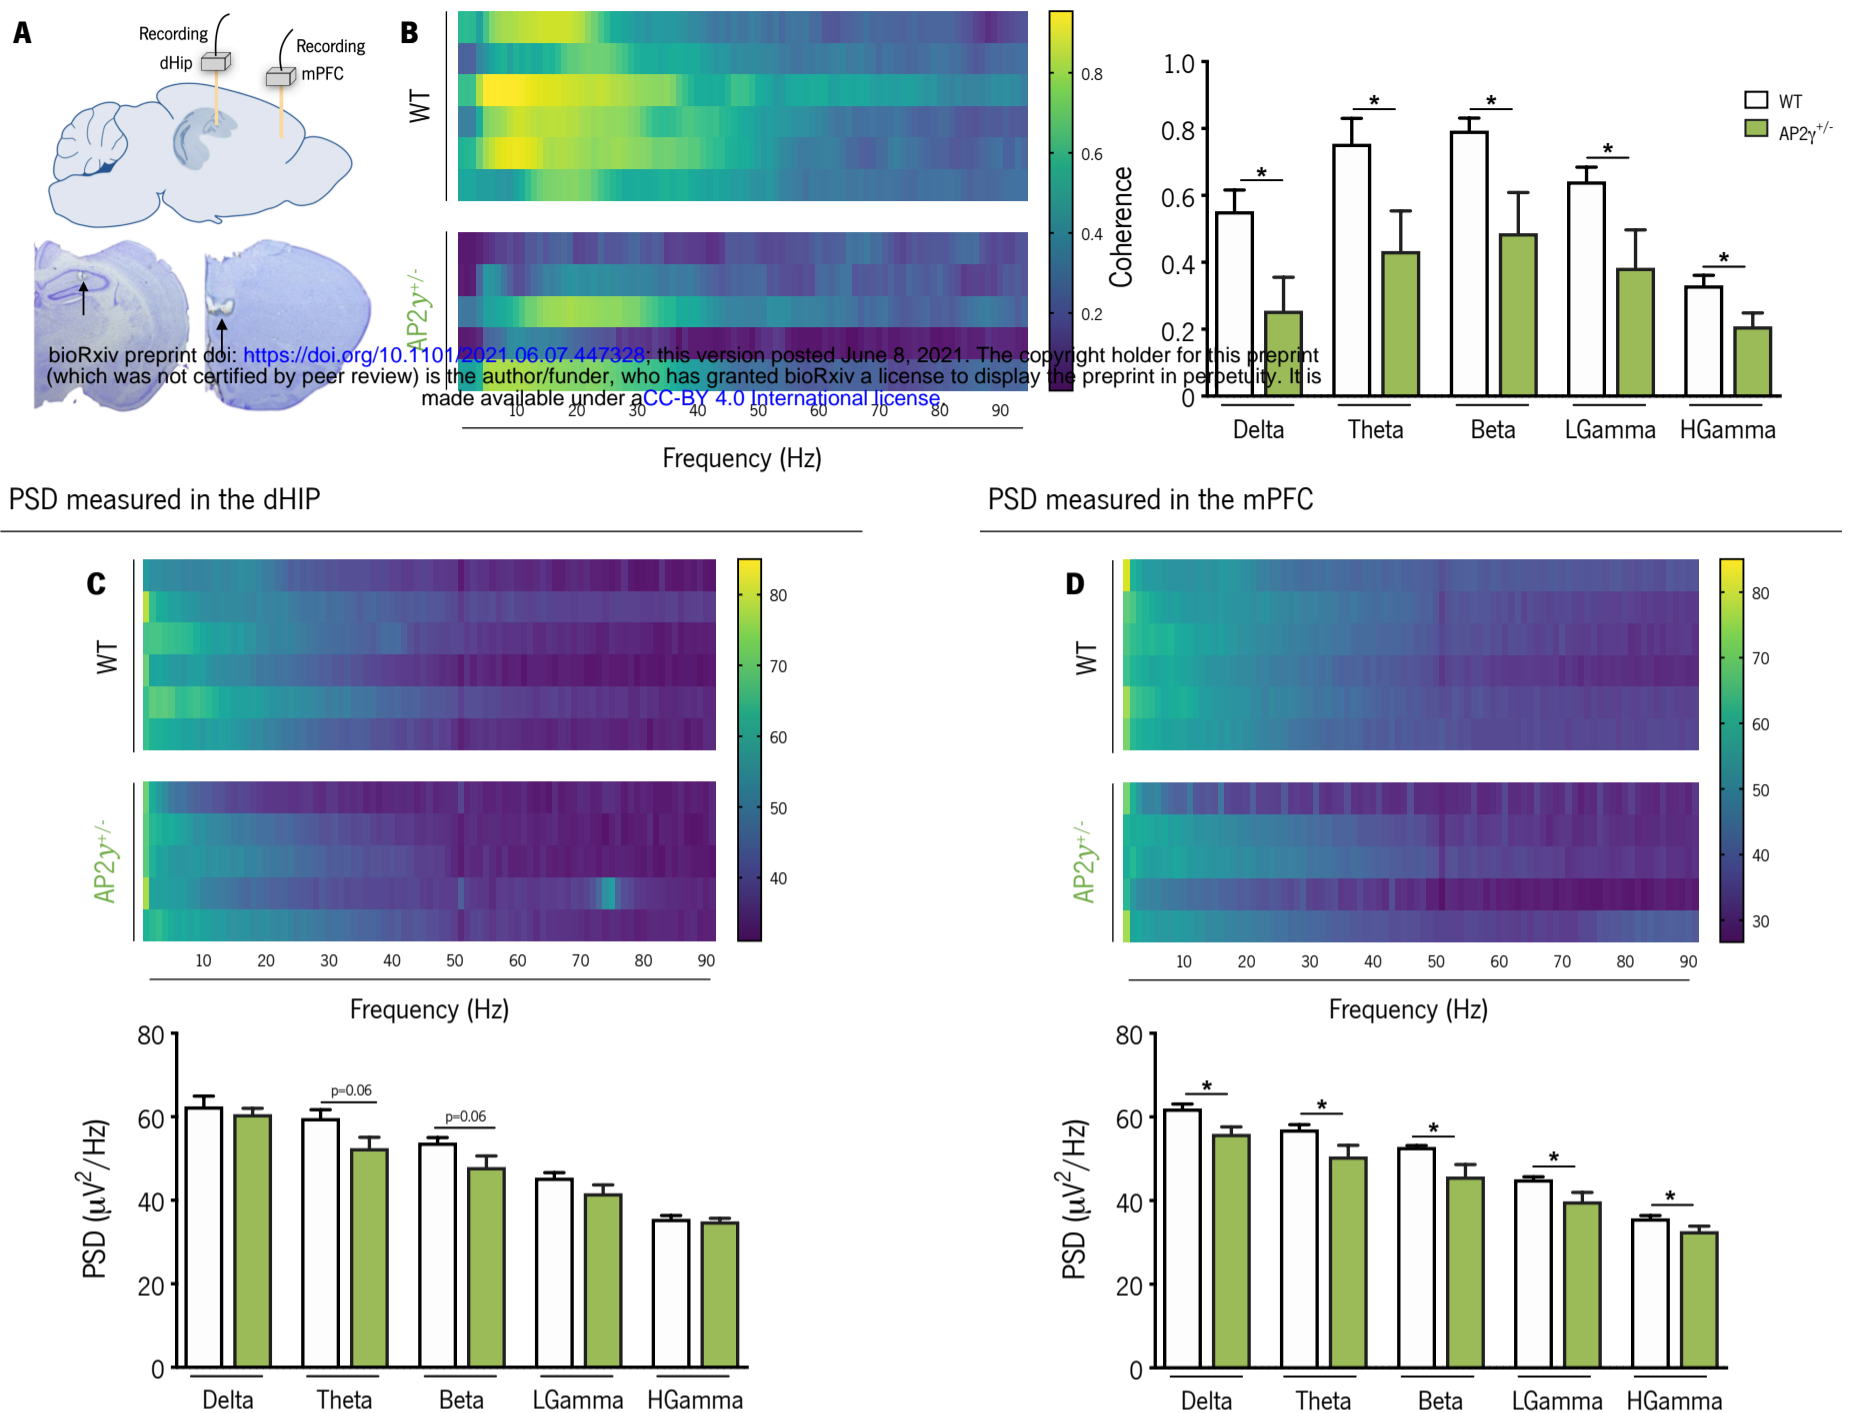

**Figure 5: AP2 $\gamma$  deficiency induces deficits in spectral coherence between the dorsal hippocampus (dHip) and the medial prefrontal cortex (mPFC), impacting neuronal activity.** (A) Identification of the local field potential (LFP) recording sites, with a depiction of the electrode positions (upper panel), and representative Cresyl violet-stained sections, with arrows indicating electrolytic lesions at the recording sites (lower panel). (B) Spectral coherence between the dHip and mPFC (left panel). Group comparison of the coherence values for each frequency (right panel). (C) Power spectral density (PSD) was measured in the dHip (C) and mPFC (D). Heatmaps of PSD activity (upper panel) and group comparison for each frequency (lower panel). Each horizontal line in the Y-axis of the presented spectrograms represents an individual mouse. Frequency bands range: delta (1-4Hz), theta (4-12 Hz), beta (12-20 Hz), low gamma (20-40 Hz), and High gamma (40-90 Hz). Data presented as mean  $\pm$  SEM.  $n_{\text{WT}} = 6$ ;  $n_{\text{AP2}\gamma^{+/-}} = 5$ . [Student's t-test;  $*p < 0.05$ ; Statistical summary in Supplementary table 1]. Abbreviations: WT, wild-type; AP2 $\gamma^{+/-}$ , AP2 $\gamma$  heterozygous knockout mice.

**Supplementary Table 1: Statistical summary of results**

| Experiment                           | Figure(s)               | Statistical details                                                                                                                                                                                                                                                                                                                                                                                                                                                                                                                                                      |
|--------------------------------------|-------------------------|--------------------------------------------------------------------------------------------------------------------------------------------------------------------------------------------------------------------------------------------------------------------------------------------------------------------------------------------------------------------------------------------------------------------------------------------------------------------------------------------------------------------------------------------------------------------------|
| Western blot protein quantifications | Figure 1C               | <p><b>AP2<math>\gamma</math> quantification:</b><br/>Student's t-test, <math>t_6 = 2.90</math>, <math>p &lt; 0.01</math></p> <p><b>Sox2 quantification:</b><br/>Student's t-test, <math>t_6 = 1.02</math>, <math>p = 0.35</math></p> <p><b>Pax6 quantification:</b><br/>Student's t-test, <math>t_6 = 2.60</math>, <math>p &lt; 0.01</math></p> <p><b>Tbr2 quantification:</b><br/>Student's t-test, <math>t_6 = 3.87</math>, <math>p &lt; 0.01</math></p> <p><math>n_{\text{WT juvenile}} = 4</math>; <math>n_{\text{AP2}\gamma^{+/-} \text{juvenile}} = 4</math></p>   |
|                                      | Figure 1D               | <p><b>AP2<math>\gamma</math> quantification:</b><br/>Student's t-test, <math>t_6 = 5.19</math>, <math>p &lt; 0.001</math></p> <p><b>Sox2 quantification:</b><br/>Student's t-test, <math>t_6 = 1.02</math>, <math>p = 0.35</math></p> <p><b>Pax6 quantification:</b><br/>Student's t-test, <math>t_6 = 6.62</math>, <math>p &lt; 0.01</math></p> <p><b>Tbr2 quantification:</b><br/>Student's t-test, <math>t_6 = 3.87</math>, <math>p &lt; 0.01</math></p> <p><math>n_{\text{WT adult}} = 4</math>; <math>n_{\text{AP2}\gamma^{+/-} \text{adult}} = 4</math></p>        |
| Cell proliferation                   | Figure 1F               | <p><b>BrdU<math>^+</math> cells:</b><br/>Student's t-test, <math>t_{10} = 2.47</math>, <math>p &lt; 0.05</math></p> <p><math>n_{\text{WT juvenile}} = 6</math>; <math>n_{\text{AP2}\gamma^{+/-} \text{juvenile}} = 6</math>;</p>                                                                                                                                                                                                                                                                                                                                         |
|                                      | Figure 1G               | <p><b>BrdU<math>^+</math>DCX<math>^+</math> cells:</b><br/>Student's t-test, <math>t_{10} = 2.58</math>, <math>p &lt; 0.05</math></p> <p><math>n_{\text{WT juvenile}} = 6</math>; <math>n_{\text{AP2}\gamma^{+/-} \text{juvenile}} = 6</math>;</p>                                                                                                                                                                                                                                                                                                                       |
|                                      | Figure 1H               | <p><b>BrdU<math>^+</math> cells:</b><br/>Student's t-test, <math>t_8 = 2.67</math>, <math>p &lt; 0.05</math></p> <p><math>n_{\text{WT adult}} = 5</math>; <math>n_{\text{AP2}\gamma^{+/-} \text{adult}} = 5</math></p>                                                                                                                                                                                                                                                                                                                                                   |
|                                      | Figure 1I               | <p><b>BrdU<math>^+</math>DCX<math>^+</math> cells:</b><br/>Student's t-test, <math>t_8 = 3.90</math>, <math>p &lt; 0.01</math></p> <p><math>n_{\text{WT adult}} = 5</math>; <math>n_{\text{AP2}\gamma^{+/-} \text{adult}} = 5</math></p>                                                                                                                                                                                                                                                                                                                                 |
|                                      | Supplementary Figure 1A | <p><b>BrdU<math>^+</math> cells:</b><br/>Two-way ANOVA, <math>F_{(1,18)} = 147.8</math>, <math>p &lt; 0.001</math><br/>Bonferroni's multiple comparisons test:<br/>Juvenile WT vs Adult WT: <math>p &lt; 0.001</math><br/>Juvenile AP2<math>\gamma^{+/-}</math> vs Adult AP2<math>\gamma^{+/-}</math>: <math>p &lt; 0.001</math></p> <p><math>n_{\text{WT juvenile}} = 6</math>; <math>n_{\text{WT juvenile}} = 5</math><br/><math>n_{\text{AP2}\gamma^{+/-} \text{juvenile}} = 6</math>; <math>n_{\text{AP2}\gamma^{+/-} \text{adult}} = 5</math></p>                   |
|                                      | Supplementary Figure 1B | <p><b>BrdU<math>^+</math>DCX<math>^+</math> cells:</b><br/>Two-way ANOVA, <math>F_{(1,18)} = 186.5</math>, <math>p &lt; 0.001</math><br/>Bonferroni's multiple comparisons test:<br/>Juvenile WT vs Adult WT: <math>p &lt; 0.001</math><br/>Juvenile AP2<math>\gamma^{+/-}</math> vs Adult AP2<math>\gamma^{+/-}</math>: <math>p &lt; 0.001</math></p> <p><math>n_{\text{WT juvenile}} = 6</math>; <math>n_{\text{WT juvenile}} = 5</math><br/><math>n_{\text{AP2}\gamma^{+/-} \text{juvenile}} = 6</math>; <math>n_{\text{AP2}\gamma^{+/-} \text{adult}} = 5</math></p> |



|                            |                                       |                                                                                                                                                                                                                                                                                                                                                                                                                                                                                                                                                                                                                                                                                                                                                                                                                                                                                                         |
|----------------------------|---------------------------------------|---------------------------------------------------------------------------------------------------------------------------------------------------------------------------------------------------------------------------------------------------------------------------------------------------------------------------------------------------------------------------------------------------------------------------------------------------------------------------------------------------------------------------------------------------------------------------------------------------------------------------------------------------------------------------------------------------------------------------------------------------------------------------------------------------------------------------------------------------------------------------------------------------------|
| 3D neuronal reconstruction | Figure 1J                             | <p><b>Dendritic length:</b><br/>Student's t-test, <math>t_6 = 0.65</math>, <math>p = 0.52</math><br/><math>n_{WT \text{ juvenile}} = 4</math>; <math>n_{AP2\gamma^{+/-} \text{ juvenile}} = 4</math></p>                                                                                                                                                                                                                                                                                                                                                                                                                                                                                                                                                                                                                                                                                                |
|                            | Figure 1K                             | <p><b>Dendritic length:</b><br/>Student's t-test, <math>t_7 = 0.27</math>, <math>p = 0.79</math><br/><math>n_{WT \text{ adult}} = 4</math>; <math>n_{AP2\gamma^{+/-} \text{ adult}} = 5</math></p>                                                                                                                                                                                                                                                                                                                                                                                                                                                                                                                                                                                                                                                                                                      |
|                            | Supplementary Figure 1C               | <p><b>Dendritic length:</b><br/>Two-way ANOVA, <math>F_{(1,108)} = 4.68</math>, <math>p &lt; 0.05</math><br/>Bonferroni's multiple comparisons test:<br/>Juvenile <math>WT</math> vs Adult <math>WT</math>: <math>p &lt; 0.05</math><br/>Juvenile <math>AP2\gamma^{+/-}</math> vs Adult <math>AP2\gamma^{+/-}</math>: <math>p &lt; 0.05</math><br/><math>n_{WT \text{ juvenile}} = 4</math>; <math>n_{AP2\gamma^{+/-} \text{ juvenile}} = 4</math><br/><math>n_{WT \text{ adult}} = 4</math>; <math>n_{AP2\gamma^{+/-} \text{ adult}} = 5</math></p>                                                                                                                                                                                                                                                                                                                                                    |
|                            | Supplementary Figure 1D               | <p><b>Neuronal arborization:</b><br/><u>Genotype's comparison (WT vs <math>AP2\gamma^{+/-}</math>):</u><br/>Juvenile phase:<br/>Repeated measures ANOVA, <math>F_{(1,72)} = 1.20</math>, <math>p = 0.28</math><br/>Adulthood:<br/>Repeated measures ANOVA, <math>F_{(1,84)} = 1.12</math>, <math>p = 0.29</math><br/><u>Timepoints comparison (juvenile vs adulthood):</u><br/>Two-way ANOVA, <math>F_{(3,156)} = 4.273</math>, <math>p &lt; 0.001</math><br/>Bonferroni's multiple comparisons test:<br/>Juvenile <math>WT</math> vs Adult <math>WT</math>: <math>p &lt; 0.001</math><br/>Juvenile <math>AP2\gamma^{+/-}</math> vs Adult <math>AP2\gamma^{+/-}</math>: <math>p &lt; 0.001</math><br/><math>n_{WT \text{ juvenile}} = 4</math>; <math>n_{WT \text{ adult}} = 5</math><br/><math>n_{AP2\gamma^{+/-} \text{ juvenile}} = 4</math>; <math>n_{AP2\gamma^{+/-} \text{ adult}} = 5</math></p> |
| OF (juvenile)              | Figure 2B and Supplementary Figure 3A | <p><b>Distance in center:</b><br/>Student's t-test, <math>t_{20} = 2.15</math>, <math>p &lt; 0.05</math><br/><b>Average velocity:</b><br/>Student's t-test, <math>t_{22} = 0.16</math>, <math>p = 0.87</math><br/><math>n_{WT \text{ juvenile}} = 13</math>; <math>n_{AP2\gamma^{+/-} \text{ juvenile}} = 11</math></p>                                                                                                                                                                                                                                                                                                                                                                                                                                                                                                                                                                                 |
| TST (juvenile)             | Figure 2C                             | <p><b>Immobility time:</b><br/>Student's t-test, <math>t_{27} = 0.23</math>, <math>p = 0.82</math><br/><math>n_{WT \text{ juvenile}} = 15</math>; <math>n_{AP2\gamma^{+/-} \text{ juvenile}} = 10</math></p>                                                                                                                                                                                                                                                                                                                                                                                                                                                                                                                                                                                                                                                                                            |
| SST (juvenile)             | Figure 2D                             | <p><b>Grooming time:</b><br/>Student's t-test, <math>t_{23} = 0.05</math>, <math>p = 0.96</math><br/><math>n_{WT \text{ juvenile}} = 4</math>; <math>n_{AP2\gamma^{+/-} \text{ juvenile}} = 4</math></p>                                                                                                                                                                                                                                                                                                                                                                                                                                                                                                                                                                                                                                                                                                |
| ORT (juvenile)             | Figure 2F and G                       | <p><b>Object location exploration:</b><br/>Student's t-test, <math>t_{15} = 0.24</math>, <math>p = 0.81</math><br/><b>Object recognition exploration:</b><br/>Student's t-test, <math>t_{15} = 2.55</math>, <math>p &lt; 0.05</math><br/><math>n_{WT \text{ juvenile}} = 11</math>; <math>n_{AP2\gamma^{+/-} \text{ juvenile}} = 8</math></p>                                                                                                                                                                                                                                                                                                                                                                                                                                                                                                                                                           |
| OF                         | Figure 3B; Supplementary Figure 4A    | <p><b>Distance in center:</b><br/>Student's t-test, <math>t_{18} = 2.10</math>, <math>p = 0.05</math></p>                                                                                                                                                                                                                                                                                                                                                                                                                                                                                                                                                                                                                                                                                                                                                                                               |

|                                         |                                                      |                                                                                                                                                                                                                                                                                                                                                          |
|-----------------------------------------|------------------------------------------------------|----------------------------------------------------------------------------------------------------------------------------------------------------------------------------------------------------------------------------------------------------------------------------------------------------------------------------------------------------------|
| (adult)                                 |                                                      | <b>Average velocity:</b><br>Student's t-test, $t_{24}=0.49$ , $p=0.63$<br>$n_{WT}=12$ ; $n_{AP2\gamma^{+/-}}=14$                                                                                                                                                                                                                                         |
| <b>EPM</b><br>(adult)                   | <b>Figure 3C</b>                                     | <b>Open arms time:</b><br>Student's t-test, $t_{18}=3.10$ , $p<0.01$<br>$n_{WT}=12$ ; $n_{AP2\gamma^{+/-}}=14$                                                                                                                                                                                                                                           |
| <b>FST</b><br>(adult)                   | <b>Figure 3D</b>                                     | <b>Immobility time:</b><br>Student's t-test, $t_{24}=0.61$ , $p=0.55$<br>$n_{WT}=12$ ; $n_{AP2\gamma^{+/-}}=14$                                                                                                                                                                                                                                          |
| <b>TST</b><br>(adult)                   | <b>Figure 3E</b>                                     | <b>Immobility time:</b><br>Student's t-test, $t_{10}=0.64$ , $p=0.54$<br>$n_{WT}=6$ ; $n_{AP2\gamma^{+/-}}_{juvenile}=6$                                                                                                                                                                                                                                 |
| <b>ORT</b><br>(adult)                   | <b>Figure 3F and G</b>                               | <b>Object location exploration:</b><br>Student's t-test, $t_{23}=1.80$ , $p=0.08$<br><b>Object recognition exploration:</b><br>Student's t-test, $t_{13}=0.27$ , $p=0.79$<br>$n_{WT\ juvenile}=12$ ; $n_{AP2\gamma^{+/-}}_{juvenile}=9$                                                                                                                  |
| <b>CFC</b><br>(adult)                   | <b>Figure 3I – K</b>                                 | <b>Context probe A:</b><br>Student's t-test, $t_{10}=2.60$ , $p<0.05$<br><b>Context probe B:</b><br>Student's t-test, $t_{11}=0.75$ , $p=0.75$<br><b>Cue Probe:</b><br>Student's t-test, $t_{11}=1.26$ , $p=0.24$<br>$n_{WT\ juvenile}=7$ ; $n_{AP2\gamma^{+/-}}_{juvenile}=6$                                                                           |
| <b>MWM</b><br>(adult)                   | <b>Figure 4B and 4C;<br/>Supplementary figure 4C</b> | <b>Spatial Reference memory task:</b><br>Repeated measures ANOVA, $F_{(1,72)}=1.35$ , $p=0.25$<br><b>Behavior flexibility:</b><br>Student's t-test, $t_{18}=6.79$ , $p<0.001$<br><b>Working memory task:</b><br>Repeated measures ANOVA, $F_{(1,72)}=0.85$ , $p=0.36$                                                                                    |
| <b>Spectral coherence<br/>dHip-mPFC</b> | <b>Figure 5B</b>                                     | <b>Delta:</b><br>Student's t-test, $t_9=2.61$ , $p<0.05$<br><b>Theta:</b><br>Student's t-test, $t_9=2.34$ , $p<0.05$<br><b>Beta:</b><br>Student's t-test, $t_9=2.62$ , $p<0.05$<br><b>Low gamma:</b><br>Student's t-test, $t_9=2.30$ , $p<0.05$<br><b>High gamma:</b><br>Student's t-test, $t_9=2.50$ , $p<0.05$<br>$n_{WT}=6$ ; $n_{AP2\gamma^{+/-}}=5$ |
| <b>PSD values<br/>dHIP</b>              | <b>Figure 5C</b>                                     | <b>Delta:</b><br>Student's t-test, $t_9=0.64$ , $p=0.54$<br><b>Theta:</b><br>Student's t-test, $t_9=2.24$ , $p=0.06$                                                                                                                                                                                                                                     |

---

|                                         |                                |                                                                                                               |
|-----------------------------------------|--------------------------------|---------------------------------------------------------------------------------------------------------------|
|                                         |                                | <b>Beta:</b><br>Student's t-test, $t_9 = 2.15$ , $p = 0.06$                                                   |
|                                         |                                | <b>Low gamma:</b><br>Student's t-test, $t_9 = 1.66$ , $p = 0.13$                                              |
|                                         |                                | <b>High gamma:</b><br>Student's t-test, $t_9 = 0.55$ , $p = 0.60$<br>$n_{WT} = 6$ ; $n_{AP2\gamma^{+/-}} = 5$ |
|                                         |                                | <b>Delta:</b><br>Student's t-test, $t_9 = 3.17$ , $p < 0.05$                                                  |
|                                         |                                | <b>Theta:</b><br>Student's t-test, $t_9 = 2.40$ , $p < 0.05$                                                  |
| <b>PSD values<br/>mPFC</b>              | <b>Figure 5D</b>               | <b>Beta:</b><br>Student's t-test, $t_9 = 2.71$ , $p < 0.05$                                                   |
|                                         |                                | <b>Low gamma:</b><br>Student's t-test, $t_9 = 2.55$ , $p < 0.05$                                              |
|                                         |                                | <b>High gamma:</b><br>Student's t-test, $t_9 = 2.29$ , $p < 0.05$<br>$n_{WT} = 6$ ; $n_{AP2\gamma^{+/-}} = 5$ |
|                                         |                                | <b>Delta:</b><br>Student's t-test, $t_9 = 1.52$ , $p = 0.17$                                                  |
|                                         |                                | <b>Theta:</b><br>Student's t-test, $t_9 = 0.86$ , $p = 0.42$                                                  |
| <b>Spectral coherence<br/>vHIP-mPFC</b> | <b>Supplementary figure 5B</b> | <b>Beta:</b><br>Student's t-test, $t_9 = 0.39$ , $p = 0.70$                                                   |
|                                         |                                | <b>Low gamma:</b><br>Student's t-test, $t_9 = 0.64$ , $p = 0.54$                                              |
|                                         |                                | <b>High gamma:</b><br>Student's t-test, $t_9 = 0.95$ , $p = 0.37$<br>$n_{WT} = 5$ ; $n_{AP2\gamma^{+/-}} = 5$ |
|                                         |                                | <b>Delta:</b><br>Student's t-test, $t_9 = 1.74$ , $p = 0.12$                                                  |
|                                         |                                | <b>Theta:</b><br>Student's t-test, $t_9 = 1.22$ , $p = 0.26$                                                  |
| <b>PSD values<br/>vHIP</b>              | <b>Supplementary figure 5C</b> | <b>Beta:</b><br>Student's t-test, $t_9 = 0.12$ , $p = 0.92$                                                   |
|                                         |                                | <b>Low gamma:</b><br>Student's t-test, $t_9 = 0.19$ , $p = 0.86$                                              |
|                                         |                                | <b>High gamma:</b><br>Student's t-test, $t_9 = 0.31$ , $p = 0.23$<br>$n_{WT} = 5$ ; $n_{AP2\gamma^{+/-}} = 5$ |

---

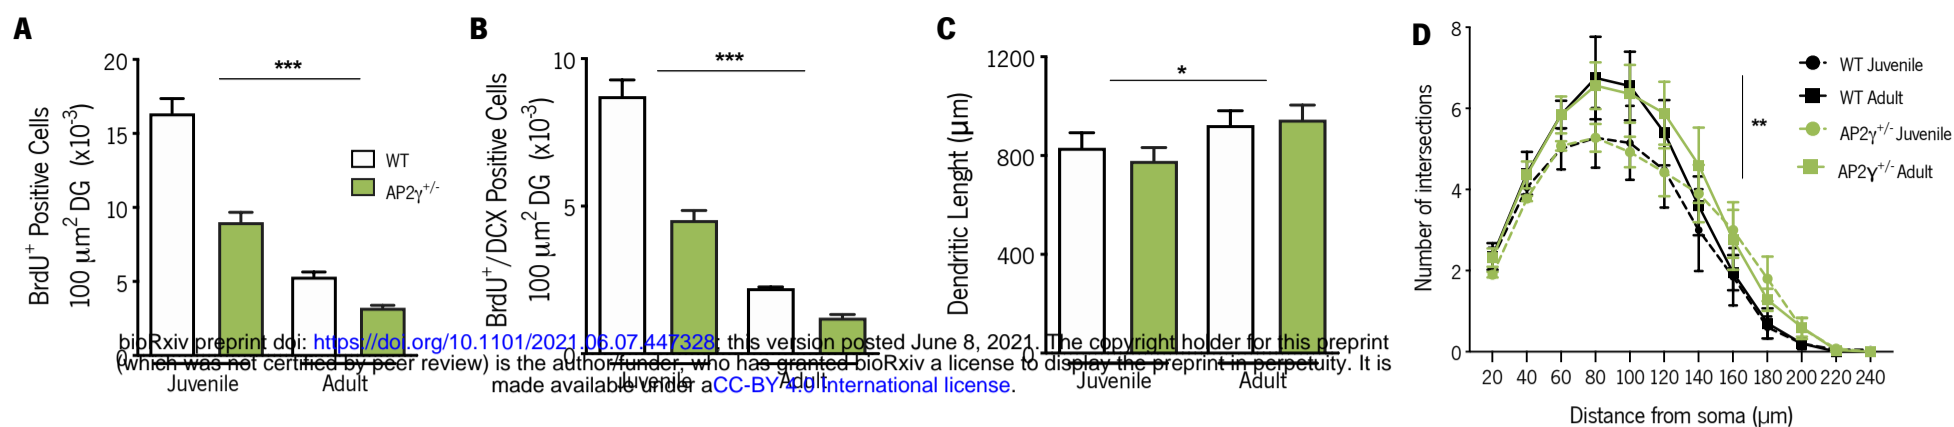

**Supplementary figure 1: Comparative analysis of neural stem cells (NSC) proliferation and maturation in the hippocampal dentate gyrus**

**(DG) at juvenile and adult periods.** Cell counts of BrdU positive (A) and BrdU/DCX double-positive (B) cells. Dendritic length (C) and complexity

(D) of hippocampal granular neurons in juvenile and adult mice. Data presented as mean ± SEM. Sample size: Immunostainings assays: n<sub>WT juvenile</sub> =

6; n<sub>AP2γ<sup>+/-</sup> juvenile</sub> = 6; n<sub>WT adult</sub> = 5; n<sub>AP2γ<sup>+/-</sup> adult</sub> = 5; 3D neuronal reconstruction: n<sub>WT juvenile</sub> = 4; n<sub>AP2γ<sup>+/-</sup> juvenile</sub> = 4; n<sub>WT adult</sub> = 4; n<sub>AP2γ<sup>+/-</sup> adult</sub> = 5. [Two-way

ANOVA and Repeated measures ANOVA, Statistical summary in Supplementary table 1] \*\*\*p < 0.001, \*\* p < 0.01; \* p < 0.05. Abbreviations: WT, wild-

type; AP2γ<sup>+/-</sup>, AP2γ heterozygous knockout mice.

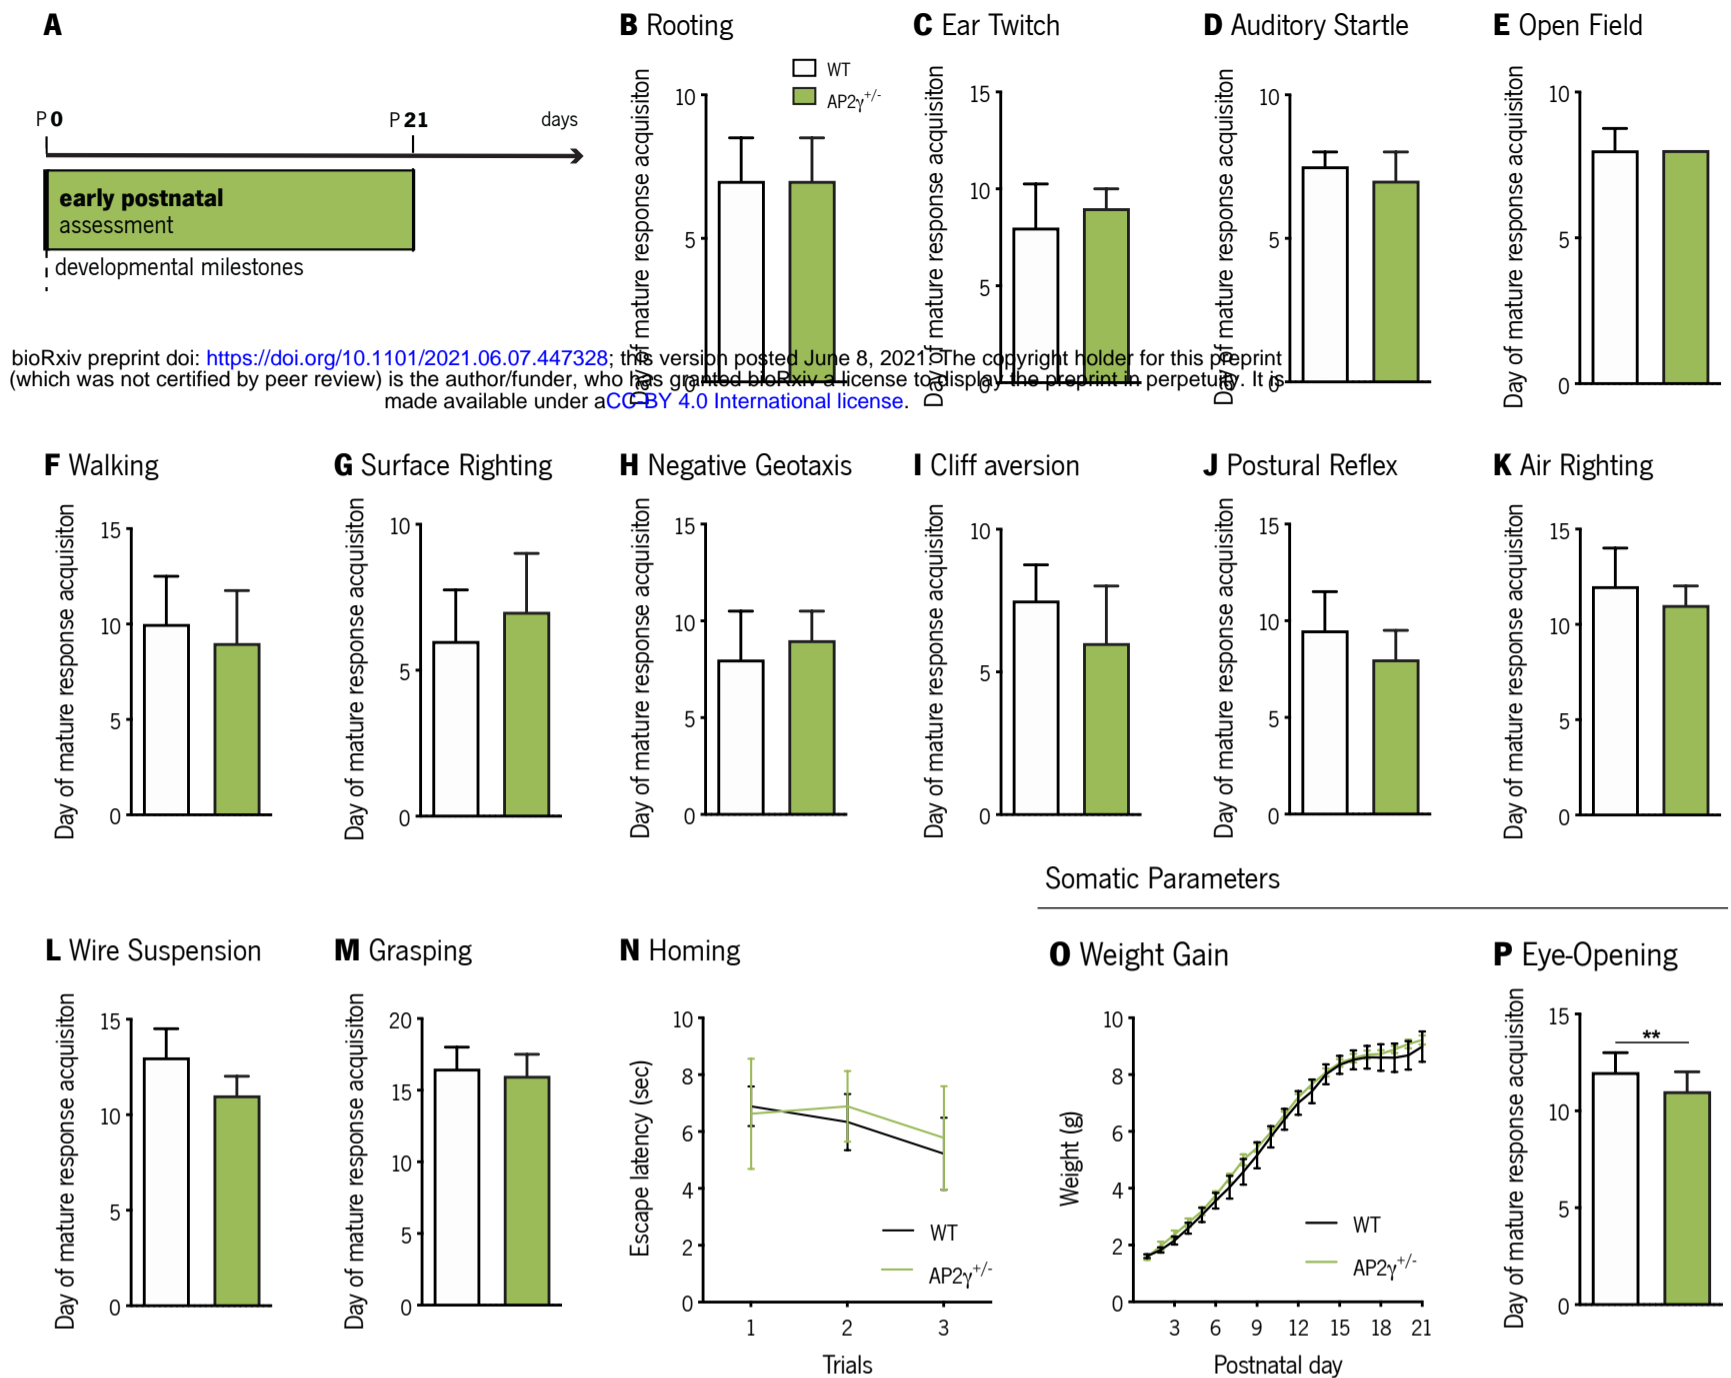

**Supplementary figure 2: AP2 $\gamma$  constitutive and heterozygous deficiency does not impact on early postnatal development.** (A) Timeline of early development assessment. (B-N) Set of established protocols to analyze the acquisition of mature responses, in neurobiological reflexes related to tactile (B and C) and auditory reflexes (D), motor function (E and F), vestibular system formation (G-K), strength (L and M), and olfactory maturation (N). Somatic parameters were also assessed. (O) Bodyweight gain from postnatal day (PND) 1 to PND 21 of WT and AP2 $\gamma$ <sup>+/-</sup> mice. (P) Eye-opening day. For the weight gain pattern, data presented as mean  $\pm$  SEM; for the remaining tests, data was plotted as median  $\pm$  IQR. Sample Size:  $n_{WT} = 9$ ;  $n_{AP2\gamma^{+/-}} = 9$ . [Mann-Whitney and Repeated measures ANOVA, \*\*  $p < 0.01$ , Statistical summary in Supplementary table 1]. Abbreviations: WT, wild-type; AP2 $\gamma$ <sup>+/-</sup>, AP2 $\gamma$  heterozygous knockout mice; IQR, Interquartile range.

## Open Field Test

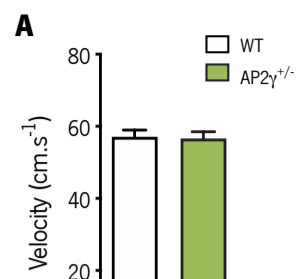

bioRxiv preprint doi: <https://doi.org/10.1101/2021.06.07.447328>; this version posted June 8, 2021. The copyright holder for this preprint (which was not certified by peer review) is the author/funder, who has granted bioRxiv a license to display the preprint in perpetuity. It is made available under aCC-BY 4.0 International license.

**Supplementary figure 3: AP2 $\gamma$  deficiency does not impact on motor function in juvenile mice.** (A) Average velocity assessed through the open field (OF) test in juvenile mice. Data presented as mean  $\pm$  SEM. Sample Size: OF:  $n_{WT} = 13$ ;  $n_{AP2\gamma^{+/-}} = 11$ . [Student's t-test, Statistical summary in Supplementary table 1]. Abbreviations: WT, wild-type; AP2 $\gamma$ <sup>+/-</sup>, AP2 $\gamma$  heterozygous knockout mice.



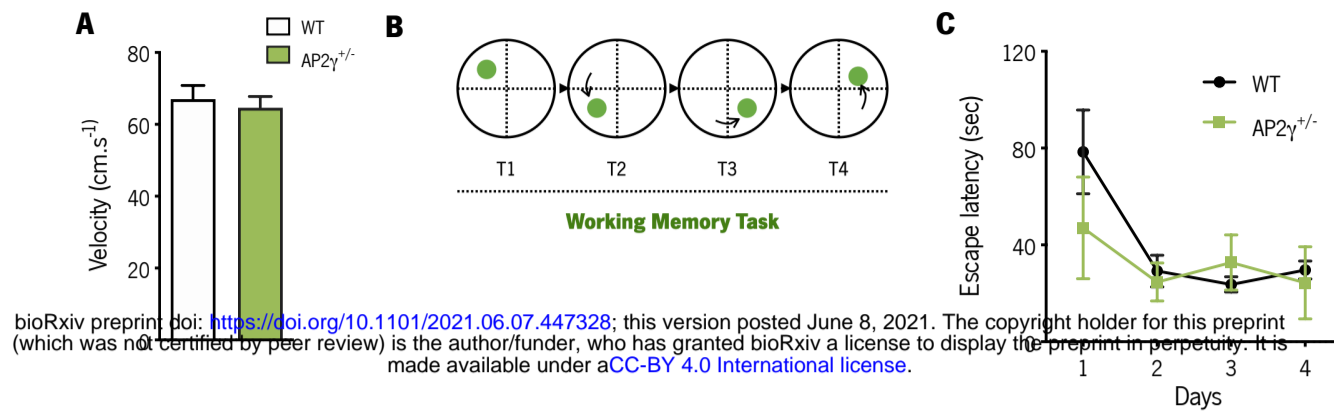

**Supplementary figure 4: Deficiency in AP2 $\gamma$  transcription factor levels does not impact motor function, nor specific modalities of cognitive behavior.** (A) Average velocity assessed through the open field (OF) test in adult mice. (B) Working memory task evaluated in the Morris water maze (MWM) test. Data presented as mean SEM. Sample size: OF:  $n_{WT} = 12$ ;  $n_{AP2\gamma^{+/-}} = 14$ ; MWM:  $n_{WT} = 10$ ;  $n_{AP2\gamma^{+/-}} = 10$ . [Student's t-test and Repeated measures ANOVA, Statistical summary in Supplementary table 1]. Abbreviations: WT, wild-type; AP2 $\gamma^{+/-}$ , AP2 $\gamma$  heterozygous knockout mice.

Coherence between vHip and mPFC

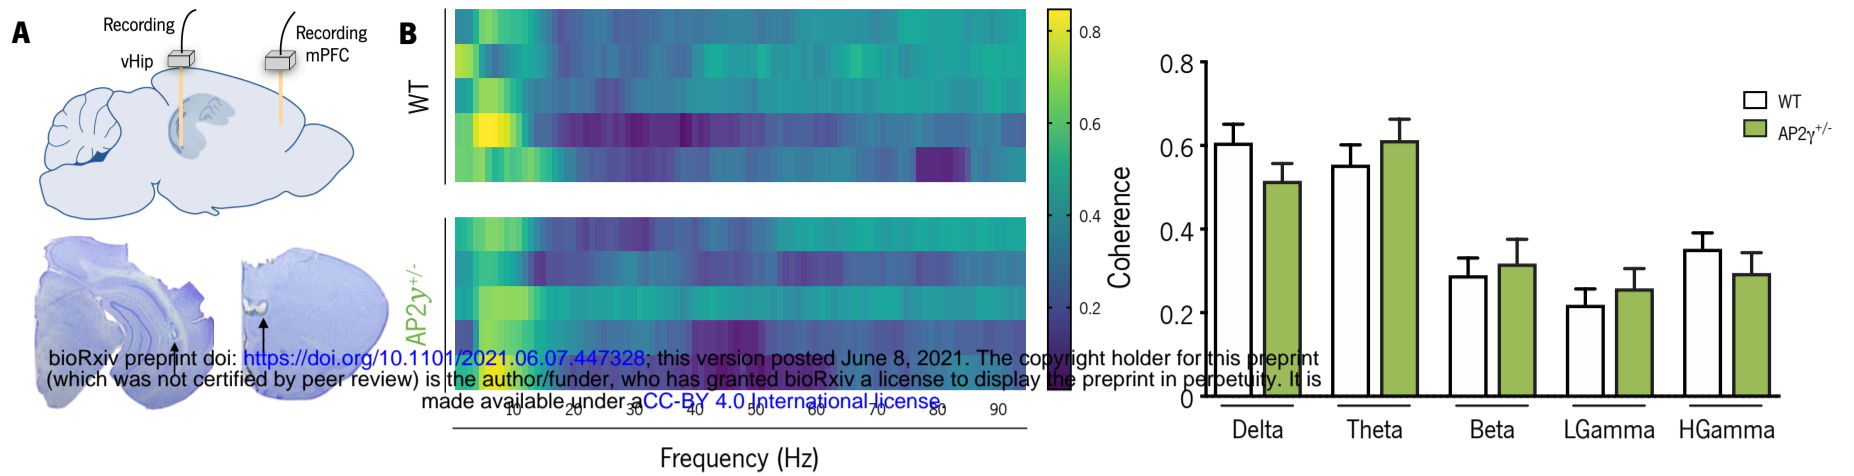

PSD measured in the vHIP

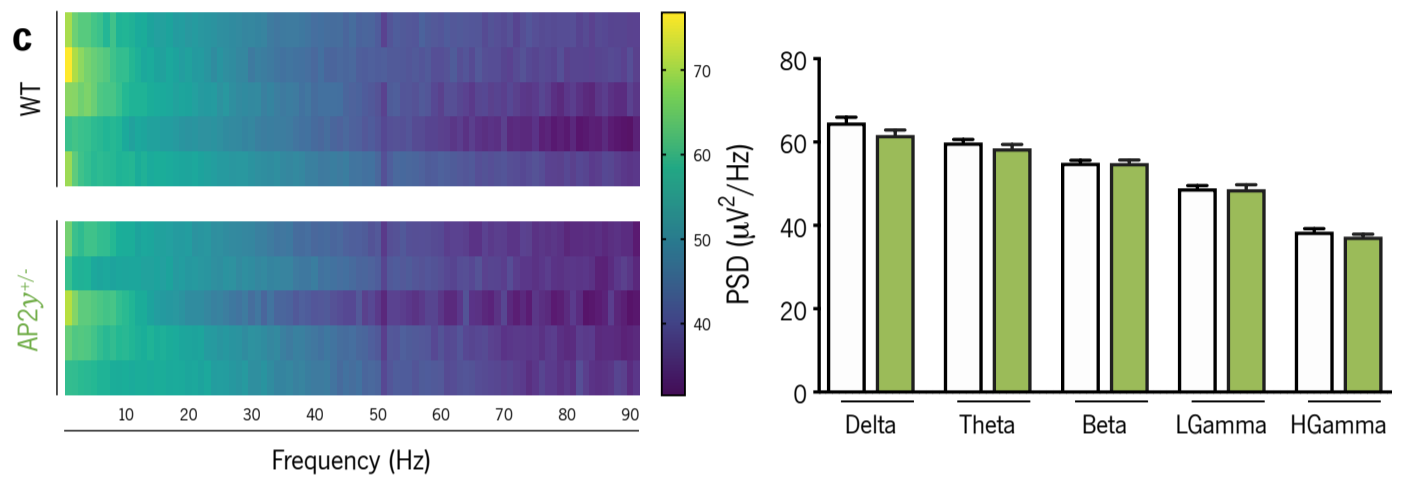

**Supplementary figure 5: AP2 $\gamma$  deficiency does not impact neither on spectral coherence between the ventral hippocampus (vHip) and the medial prefrontal cortex (mPFC), nor the neuronal activity in each region.** (A) Local field potentials (LFP) recording sites, with a depiction of the electrode positions (upper panel), and representative Cresyl violet-stained section (lower panel). (B) Spectral coherence (left panel) and group comparison for each frequency (right panel), between the vHip and mPFC of adult WT and AP2 $\gamma$ <sup>+/-</sup> mice. (C) Power spectral density (PSD) (upper panel), and group comparison of the PSD values in the vHip for each frequency (lower panel). In spectrograms, each horizontal line in the Y-axis represents an individual mouse. Frequency bands range: delta (1-4Hz), theta (4-12 Hz), beta (12-20 Hz), low gamma (20-40 Hz), and High gamma (40-90 Hz). Data presented as mean SEM.  $n_{\text{WT}} = 5$ ;  $n_{\text{AP2}\gamma^{+/-}} = 5$ . [Student's t-test, Statistical summary in Supplementary table 1]. Abbreviations: WT, wild-type; AP2 $\gamma$ <sup>+/-</sup>, AP2 $\gamma$  heterozygous knockout mice; vHip, ventral hippocampus; mPFC, medial prefrontal cortex.
